# Supplementary material for: Impact of early detection on cancer curability: A modified Delphi panel study
Source: PubMed Central journal article supplement (PMC9770338; doi:10.1371/journal.pone.0279227), 2022-12-21
Supplement: pone.0279227.s001.pdf [file pone.0279227.s001.pdf]

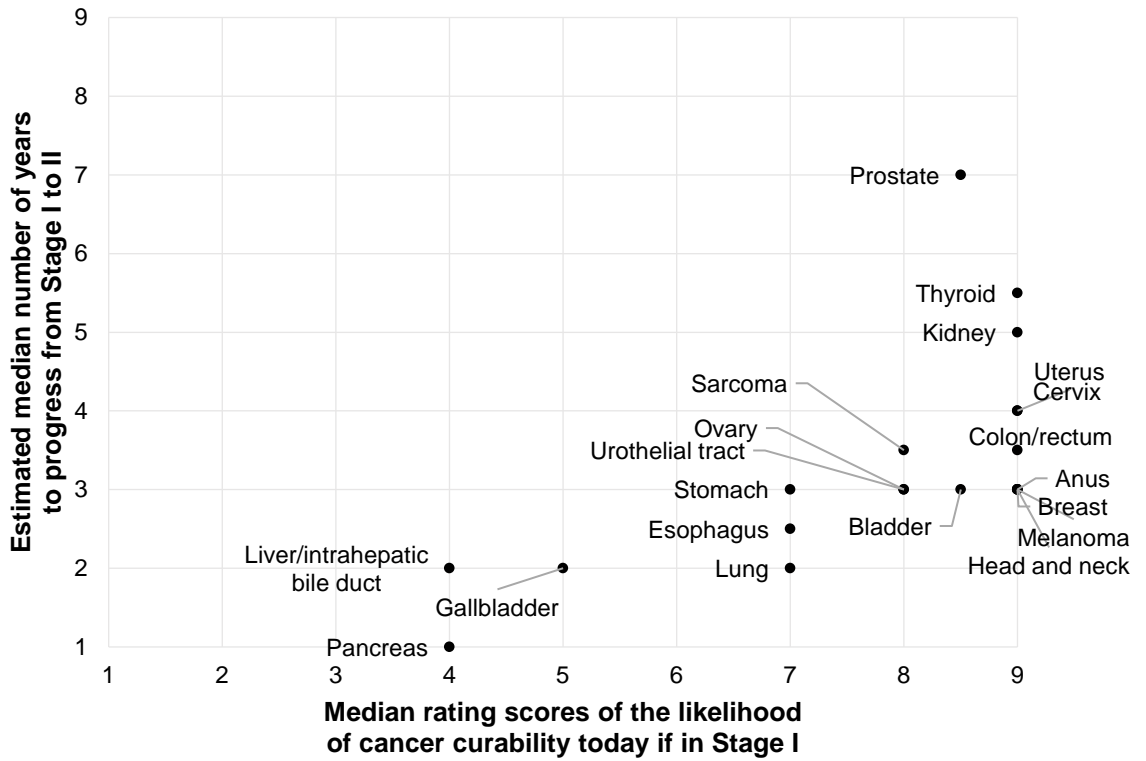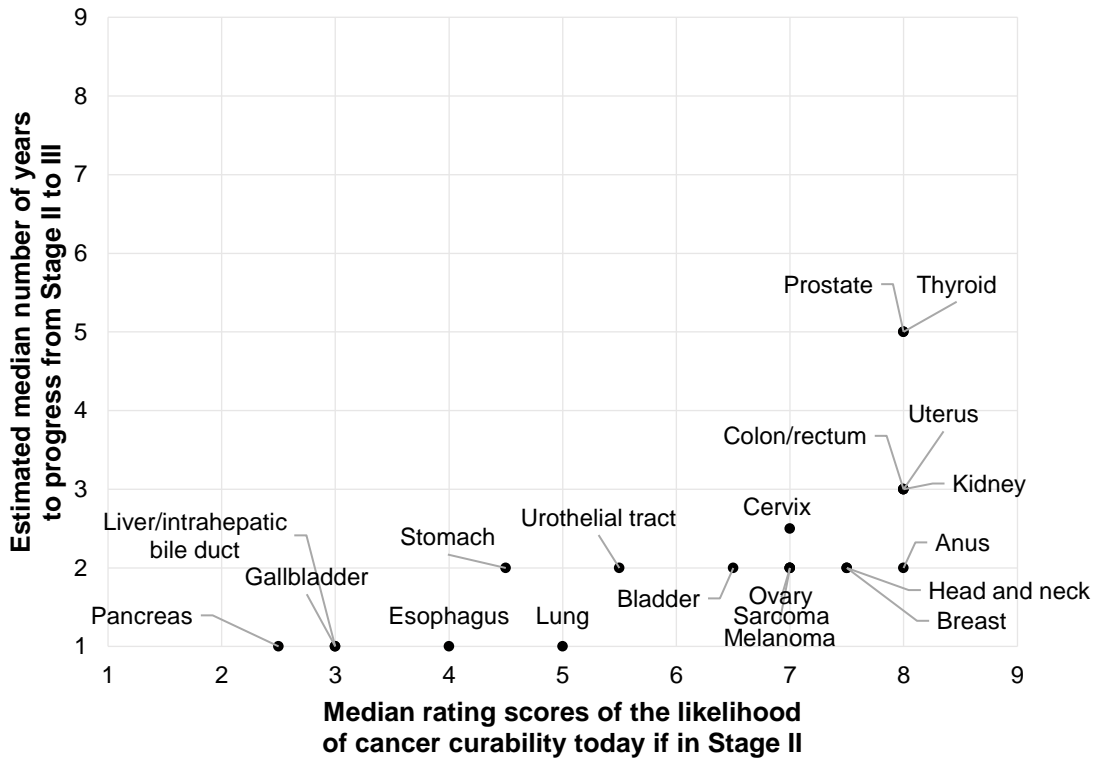

**S1 Fig. Estimated cancer curability at a given stage and progression to the next stage.**
