# Supplementary material for: Impact of early detection on cancer curability: A modified Delphi panel study
Source: PubMed Central journal article supplement (PMC9770338; doi:10.1371/journal.pone.0279227), 2022-12-21
Supplement: pone.0279227.s002.pdf [file pone.0279227.s002.pdf]

**All Panelists**

The following document presents the group's median and range of ratings. Each cell is color coded. Cells in yellow are ones where the group disagreed ( $\geq 2$  panelists gave that cell a rating of 1-3 and  $\geq 2$  panelists gave that cell a rating of 7-9); cells in blue are ones where the group agreed, with the darker blues representing higher medians, as shown in the key on the right.

| Median                                                                      | (Range) |
|-----------------------------------------------------------------------------|---------|
| Yellow: Disagreement ( $\geq 2$ ratings of 1-3 and $\geq 2$ ratings of 7-9) |         |
| Blue 1: Median $\geq 7$ without disagreement                                |         |
| Blue 2: Median $\geq 4$ - $< 7$ , without disagreement                      |         |
| Blue 3: Median 1- $< 4$ without disagreement                                |         |

**SECTION 1**

**TABLE 1. SOLID ORGAN CANCERS**

|                                                                                                 |                                                                                                                                              |                                                                                                                                                           |                                                                                                                                                                                 |                                                                                                                                       |                                                                                                                     |                                                              |                                                                        |                                                                                                                                                                                                                                                  |                                                                                                                                                                                                                                                                                                                                                                                                 |                                                                                                   |                                                                                                                                                                                                                   |  |  |  |  |  |  |  |  |  |
|-------------------------------------------------------------------------------------------------|----------------------------------------------------------------------------------------------------------------------------------------------|-----------------------------------------------------------------------------------------------------------------------------------------------------------|---------------------------------------------------------------------------------------------------------------------------------------------------------------------------------|---------------------------------------------------------------------------------------------------------------------------------------|---------------------------------------------------------------------------------------------------------------------|--------------------------------------------------------------|------------------------------------------------------------------------|--------------------------------------------------------------------------------------------------------------------------------------------------------------------------------------------------------------------------------------------------|-------------------------------------------------------------------------------------------------------------------------------------------------------------------------------------------------------------------------------------------------------------------------------------------------------------------------------------------------------------------------------------------------|---------------------------------------------------------------------------------------------------|-------------------------------------------------------------------------------------------------------------------------------------------------------------------------------------------------------------------|--|--|--|--|--|--|--|--|--|
| Please enter a rating in each yellow cell, where each cell represents a cancer or cancer stage. | Q1: What is the likelihood that patients diagnosed with this cancer at this stage today will be cured [1] with <b>typical treatment</b> [2]? | Q2: What is the likelihood that <b>untreated patients</b> with stage I or II of this cancer will progress to stage III or IV disease over their lifetime? | Q3: How long does it take this cancer to progress from the beginning of this stage [3] to the beginning of the next stage in undiagnosed patients (natural history of disease)? | Q4: ... <b>life expectancy</b> increase in all patients with this cancer, relative to life expectancy without the screening test [6]? | ... <b>cure rates</b> increase in all patients with this cancer, relative to cure rates without the screening test? | Q5: Assume patients are receiving <b>typical treatment</b> . | Q6: Assume patients are receiving <b>best available treatment</b> [7]. | Q7: If all cancers of this type were diagnosed no later than this stage, to what extent would <b>cure rates</b> increase with <b>typical treatment</b> in all patients with this cancer, relative to 2030 cure rates without the screening test? | Imagine an annual hypothetical screening blood test for patients $\geq 50$ years of age that is 100% sensitive and 100% specific for the stage of cancer you are being asked to rate. Assume this test cannot differentiate between higher and lower risk cancers. If all cancers of this type were diagnosed no later than the stage [4] indicated by the row heading, to what extent would... | Now consider what medical practice might be like in 2030 [5] with cure rates higher than today's. |                                                                                                                                                                                                                   |  |  |  |  |  |  |  |  |  |
|                                                                                                 |                                                                                                                                              |                                                                                                                                                           |                                                                                                                                                                                 |                                                                                                                                       |                                                                                                                     |                                                              |                                                                        |                                                                                                                                                                                                                                                  |                                                                                                                                                                                                                                                                                                                                                                                                 |                                                                                                   | For columns <b>A</b> through <b>F</b> , enter a rating of 1 through 9, where:<br>1=Extremely unlikely<br>3=Somewhat unlikely<br>5=Neutral, neither likely nor unlikely<br>7=Somewhat likely<br>9=Extremely likely |  |  |  |  |  |  |  |  |  |
|                                                                                                 |                                                                                                                                              |                                                                                                                                                           |                                                                                                                                                                                 |                                                                                                                                       |                                                                                                                     |                                                              |                                                                        |                                                                                                                                                                                                                                                  |                                                                                                                                                                                                                                                                                                                                                                                                 |                                                                                                   | For column <b>G</b> , enter a rating of 1 through 9, where:<br>1=Less than 1 year<br>5=5 years<br>9=9 or more years                                                                                               |  |  |  |  |  |  |  |  |  |
|                                                                                                 |                                                                                                                                              |                                                                                                                                                           |                                                                                                                                                                                 |                                                                                                                                       |                                                                                                                     |                                                              |                                                                        |                                                                                                                                                                                                                                                  |                                                                                                                                                                                                                                                                                                                                                                                                 |                                                                                                   |                                                                                                                                                                                                                   |  |  |  |  |  |  |  |  |  |
|                                                                                                 | Lower risk [8]                                                                                                                               | Higher risk [9]                                                                                                                                           | Overall                                                                                                                                                                         | Lower risk                                                                                                                            | Higher risk                                                                                                         | Overall                                                      | Overall                                                                | Overall                                                                                                                                                                                                                                          | Overall                                                                                                                                                                                                                                                                                                                                                                                         | Overall                                                                                           |                                                                                                                                                                                                                   |  |  |  |  |  |  |  |  |  |
|                                                                                                 | <b>A</b>                                                                                                                                     | <b>B</b>                                                                                                                                                  | <b>C</b>                                                                                                                                                                        | <b>D</b>                                                                                                                              | <b>E</b>                                                                                                            | <b>F</b>                                                     | <b>G</b>                                                               | <b>H</b>                                                                                                                                                                                                                                         | <b>I</b>                                                                                                                                                                                                                                                                                                                                                                                        | <b>J</b>                                                                                          | <b>K</b>                                                                                                                                                                                                          |  |  |  |  |  |  |  |  |  |
| <b>Prostate</b>                                                                                 | <b>1</b>                                                                                                                                     |                                                                                                                                                           |                                                                                                                                                                                 | 3.5 ( 1 - 8 )                                                                                                                         | 7.0 ( 5 - 9 )                                                                                                       | 6.0 ( 3 - 7 )                                                |                                                                        |                                                                                                                                                                                                                                                  |                                                                                                                                                                                                                                                                                                                                                                                                 |                                                                                                   |                                                                                                                                                                                                                   |  |  |  |  |  |  |  |  |  |
| Stage I                                                                                         | <b>2</b>                                                                                                                                     | 9.0 ( 9 - 9 )                                                                                                                                             | 8.0 ( 5 - 9 )                                                                                                                                                                   | 8.5 ( 7 - 9 )                                                                                                                         |                                                                                                                     |                                                              | 7.0 ( 5 - 9 )                                                          | 3.0 ( 1 - 8 )                                                                                                                                                                                                                                    | 3.0 ( 1 - 8 )                                                                                                                                                                                                                                                                                                                                                                                   | 3.5 ( 1 - 8 )                                                                                     | 3.5 ( 1 - 8 )                                                                                                                                                                                                     |  |  |  |  |  |  |  |  |  |
| Stage II                                                                                        | <b>3</b>                                                                                                                                     | 9.0 ( 8 - 9 )                                                                                                                                             | 7.0 ( 5 - 9 )                                                                                                                                                                   | 8.0 ( 7 - 9 )                                                                                                                         |                                                                                                                     |                                                              | 5.0 ( 4 - 7 )                                                          | 3.5 ( 2 - 6 )                                                                                                                                                                                                                                    | 3.0 ( 2 - 6 )                                                                                                                                                                                                                                                                                                                                                                                   | 3.0 ( 2 - 6 )                                                                                     | 4.5 ( 2 - 6 )                                                                                                                                                                                                     |  |  |  |  |  |  |  |  |  |
| Stage III                                                                                       | <b>4</b>                                                                                                                                     | 7.0 ( 3 - 9 )                                                                                                                                             | 3.5 ( 3 - 8 )                                                                                                                                                                   | 5.5 ( 3 - 8 )                                                                                                                         |                                                                                                                     |                                                              | 3.0 ( 2 - 5 )                                                          | 3.0 ( 1 - 5 )                                                                                                                                                                                                                                    | 2.5 ( 1 - 5 )                                                                                                                                                                                                                                                                                                                                                                                   | 3.0 ( 1 - 6 )                                                                                     | 4.5 ( 2 - 6 )                                                                                                                                                                                                     |  |  |  |  |  |  |  |  |  |
| Stage IV                                                                                        | <b>5</b>                                                                                                                                     | 1.0 ( 1 - 7 )                                                                                                                                             | 1.0 ( 1 - 4 )                                                                                                                                                                   | 1.0 ( 1 - 5 )                                                                                                                         |                                                                                                                     |                                                              |                                                                        |                                                                                                                                                                                                                                                  |                                                                                                                                                                                                                                                                                                                                                                                                 |                                                                                                   |                                                                                                                                                                                                                   |  |  |  |  |  |  |  |  |  |
| <b>Breast</b>                                                                                   | <b>6</b>                                                                                                                                     |                                                                                                                                                           |                                                                                                                                                                                 | 6.0 ( 2 - 8 )                                                                                                                         | 8.0 ( 5 - 9 )                                                                                                       | 7.0 ( 4 - 8 )                                                |                                                                        |                                                                                                                                                                                                                                                  |                                                                                                                                                                                                                                                                                                                                                                                                 |                                                                                                   |                                                                                                                                                                                                                   |  |  |  |  |  |  |  |  |  |
| Stage I                                                                                         | <b>7</b>                                                                                                                                     | 9.0 ( 8 - 9 )                                                                                                                                             | 8.0 ( 6 - 9 )                                                                                                                                                                   | 9.0 ( 7 - 9 )                                                                                                                         |                                                                                                                     |                                                              | 3.0 ( 2 - 9 )                                                          | 7.0 ( 3 - 8 )                                                                                                                                                                                                                                    | 6.5 ( 3 - 8 )                                                                                                                                                                                                                                                                                                                                                                                   | 6.5 ( 3 - 8 )                                                                                     | 7.5 ( 3 - 9 )                                                                                                                                                                                                     |  |  |  |  |  |  |  |  |  |
| Stage II                                                                                        | <b>8</b>                                                                                                                                     | 8.0 ( 8 - 9 )                                                                                                                                             | 6.5 ( 4 - 8 )                                                                                                                                                                   | 7.5 ( 6 - 9 )                                                                                                                         |                                                                                                                     |                                                              | 2.0 ( 1 - 6 )                                                          | 5.5 ( 3 - 7 )                                                                                                                                                                                                                                    | 5.5 ( 2 - 7 )                                                                                                                                                                                                                                                                                                                                                                                   | 5.5 ( 3 - 7 )                                                                                     | 6.0 ( 4 - 7 )                                                                                                                                                                                                     |  |  |  |  |  |  |  |  |  |
| Stage III                                                                                       | <b>9</b>                                                                                                                                     | 6.5 ( 3 - 9 )                                                                                                                                             | 4.0 ( 3 - 5 )                                                                                                                                                                   | 5.5 ( 3 - 9 )                                                                                                                         |                                                                                                                     |                                                              | 1.5 ( 1 - 3 )                                                          | 3.0 ( 2 - 6 )                                                                                                                                                                                                                                    | 3.0 ( 1 - 6 )                                                                                                                                                                                                                                                                                                                                                                                   | 3.0 ( 1 - 6 )                                                                                     | 5.5 ( 2 - 7 )                                                                                                                                                                                                     |  |  |  |  |  |  |  |  |  |
| Stage IV                                                                                        | <b>10</b>                                                                                                                                    | 1.5 ( 1 - 5 )                                                                                                                                             | 1.0 ( 1 - 1 )                                                                                                                                                                   | 1.0 ( 1 - 3 )                                                                                                                         |                                                                                                                     |                                                              |                                                                        |                                                                                                                                                                                                                                                  |                                                                                                                                                                                                                                                                                                                                                                                                 |                                                                                                   |                                                                                                                                                                                                                   |  |  |  |  |  |  |  |  |  |
| <b>Lung</b>                                                                                     | <b>11</b>                                                                                                                                    |                                                                                                                                                           |                                                                                                                                                                                 | 7.0 ( 3 - 9 )                                                                                                                         | 9.0 ( 2 - 9 )                                                                                                       | 8.0 ( 2 - 9 )                                                |                                                                        |                                                                                                                                                                                                                                                  |                                                                                                                                                                                                                                                                                                                                                                                                 |                                                                                                   |                                                                                                                                                                                                                   |  |  |  |  |  |  |  |  |  |
| Stage I                                                                                         | <b>12</b>                                                                                                                                    | 7.5 ( 7 - 9 )                                                                                                                                             | 6.0 ( 3 - 7 )                                                                                                                                                                   | 7.0 ( 5 - 9 )                                                                                                                         |                                                                                                                     |                                                              | 2.0 ( 1 - 9 )                                                          | 8.0 ( 7 - 9 )                                                                                                                                                                                                                                    | 8.0 ( 5 - 9 )                                                                                                                                                                                                                                                                                                                                                                                   | 8.0 ( 6 - 9 )                                                                                     | 8.5 ( 3 - 9 )                                                                                                                                                                                                     |  |  |  |  |  |  |  |  |  |
| Stage II                                                                                        | <b>13</b>                                                                                                                                    | 5.0 ( 3 - 8 )                                                                                                                                             | 4.5 ( 1 - 6 )                                                                                                                                                                   | 5.0 ( 3 - 8 )                                                                                                                         |                                                                                                                     |                                                              | 1.0 ( 1 - 7 )                                                          | 6.0 ( 5 - 8 )                                                                                                                                                                                                                                    | 6.0 ( 4 - 8 )                                                                                                                                                                                                                                                                                                                                                                                   | 7.0 ( 5 - 8 )                                                                                     | 7.5 ( 4 - 9 )                                                                                                                                                                                                     |  |  |  |  |  |  |  |  |  |
| Stage III                                                                                       | <b>14</b>                                                                                                                                    | 3.0 ( 1 - 6 )                                                                                                                                             | 2.5 ( 1 - 4 )                                                                                                                                                                   | 3.0 ( 1 - 5 )                                                                                                                         |                                                                                                                     |                                                              | 1.0 ( 1 - 3 )                                                          | 3.5 ( 3 - 7 )                                                                                                                                                                                                                                    | 3.0 ( 1 - 5 )                                                                                                                                                                                                                                                                                                                                                                                   | 4.0 ( 1 - 6 )                                                                                     | 5.0 ( 2 - 7 )                                                                                                                                                                                                     |  |  |  |  |  |  |  |  |  |
| Stage IV                                                                                        | <b>15</b>                                                                                                                                    | 1.0 ( 1 - 2 )                                                                                                                                             | 1.0 ( 1 - 1 )                                                                                                                                                                   | 1.0 ( 1 - 2 )                                                                                                                         |                                                                                                                     |                                                              |                                                                        |                                                                                                                                                                                                                                                  |                                                                                                                                                                                                                                                                                                                                                                                                 |                                                                                                   |                                                                                                                                                                                                                   |  |  |  |  |  |  |  |  |  |

[1] Curability is the extent to which a patient diagnosed with cancer is more likely to die of something else. If a cancer is completely curable, no one will die of cancer.

[2] Includes active treatment or surveillance.

[3] For example, to answer 2G, consider the time from the beginning of stage I to the beginning of stage II. For 3G, consider the time from the beginning of stage II to the beginning of stage III. Similarly, for 4G, consider the time from the beginning of stage III to the beginning of stage IV.

[4] For stage I, assume all stage II-IV cancers are detected during stage I. For stage II, assume that all stage III and IV cancers are detected by stage II; any cancers that had been detected in stage I or II would still be detected during those stages. For the stage III, assume all stage IV cancers were diagnosed during stage III; any cancers that had been detected in stages I-III would still be detected during those stages.

[5] If there are many treatment advancements, cure rates may increase, and if treatment remains unchanged, cure rates are unlikely to change.

[6] A patient who is not cured could have increased life expectancy (e.g. still die of this cancer).

[7] Treatment consistent with NCCN guidelines.

[8] Please refer to the table above for examples of lower risk cancers.

[9] Please refer to the table above for examples of higher risk cancers.

|                      |    | Q1: What is the likelihood that patients diagnosed with this cancer at this stage today will be cured [1] with <b>typical treatment</b> [2]?                                                       |                 |               | Q2: What is the likelihood that <b>untreated patients</b> with stage I or II of this cancer will progress to stage III or IV disease over their lifetime? |             |               | Q3: How long does it take this cancer to progress from the beginning of this stage [3] to the beginning of the next stage in undiagnosed patients (natural history of disease)? |               |               | Q4: ... <b>life expectancy</b> increase in all patients with this cancer, relative to life expectancy without the screening test [6]?                                                                                                                                                                                                   |               |               | Q5: Assume patients are receiving <b>typical treatment</b> . ... <b>cure rates</b> increase in all patients with this cancer, relative to cure rates without the screening test? |  |  | Q6: Assume patients are receiving <b>best available treatment</b> [7]. |  |  | Q7: If all cancers of this type were diagnosed no later than this stage, to what extent would <b>cure rates</b> increase with <b>typical treatment</b> in all patients with this cancer, relative to 2030 cure rates without the screening test? |  |  |
|----------------------|----|----------------------------------------------------------------------------------------------------------------------------------------------------------------------------------------------------|-----------------|---------------|-----------------------------------------------------------------------------------------------------------------------------------------------------------|-------------|---------------|---------------------------------------------------------------------------------------------------------------------------------------------------------------------------------|---------------|---------------|-----------------------------------------------------------------------------------------------------------------------------------------------------------------------------------------------------------------------------------------------------------------------------------------------------------------------------------------|---------------|---------------|----------------------------------------------------------------------------------------------------------------------------------------------------------------------------------|--|--|------------------------------------------------------------------------|--|--|--------------------------------------------------------------------------------------------------------------------------------------------------------------------------------------------------------------------------------------------------|--|--|
|                      |    | For columns A through F, enter a rating of 1 through 9, where:<br>1=Extremely unlikely<br>3=Somewhat unlikely<br>5=Neutral, neither likely nor unlikely<br>7=Somewhat likely<br>9=Extremely likely |                 |               |                                                                                                                                                           |             |               | For column G, enter a rating of 1 through 9, where:<br>1=Less than 1 year<br>5=5 years<br>9=9 or more years                                                                     |               |               | For columns H through K, enter a rating of 1 through 9, where your answer reflects your judgement about how much the outcome of interest (e.g., life expectancy in Q4 and cure rates in Q5, Q6, Q7) would increase:<br>1=Not at all<br>3=Slightly<br>5=Moderately<br>7=Considerably<br>9=A great deal, doubling the outcome of interest |               |               |                                                                                                                                                                                  |  |  |                                                                        |  |  |                                                                                                                                                                                                                                                  |  |  |
|                      |    | Lower risk [8]                                                                                                                                                                                     | Higher risk [9] | Overall       | Lower risk                                                                                                                                                | Higher risk | Overall       | Overall                                                                                                                                                                         | Overall       | Overall       | Overall                                                                                                                                                                                                                                                                                                                                 | Overall       | Overall       | Overall                                                                                                                                                                          |  |  |                                                                        |  |  |                                                                                                                                                                                                                                                  |  |  |
| A                    | B  | C                                                                                                                                                                                                  | D               | E             | F                                                                                                                                                         | G           | H             | I                                                                                                                                                                               | J             | K             |                                                                                                                                                                                                                                                                                                                                         |               |               |                                                                                                                                                                                  |  |  |                                                                        |  |  |                                                                                                                                                                                                                                                  |  |  |
| <b>Colon/Rectum</b>  | 16 |                                                                                                                                                                                                    |                 |               |                                                                                                                                                           |             | 7.0 ( 6 - 9 ) | 8.0 ( 5 - 9 )                                                                                                                                                                   | 8.0 ( 6 - 9 ) |               |                                                                                                                                                                                                                                                                                                                                         |               |               |                                                                                                                                                                                  |  |  |                                                                        |  |  |                                                                                                                                                                                                                                                  |  |  |
| Stage I              | 17 | 9.0 ( 8 - 9 )                                                                                                                                                                                      | 9.0 ( 8 - 9 )   | 9.0 ( 8 - 9 ) |                                                                                                                                                           |             |               |                                                                                                                                                                                 |               | 3.5 ( 2 - 7 ) | 7.5 ( 6 - 9 )                                                                                                                                                                                                                                                                                                                           | 7.0 ( 6 - 9 ) | 8.0 ( 6 - 9 ) | 8.0 ( 3 - 9 )                                                                                                                                                                    |  |  |                                                                        |  |  |                                                                                                                                                                                                                                                  |  |  |
| Stage II             | 18 | 8.0 ( 7 - 9 )                                                                                                                                                                                      | 7.0 ( 7 - 8 )   | 8.0 ( 7 - 8 ) |                                                                                                                                                           |             |               |                                                                                                                                                                                 |               | 3.0 ( 2 - 5 ) | 6.0 ( 5 - 8 )                                                                                                                                                                                                                                                                                                                           | 6.0 ( 5 - 8 ) | 6.5 ( 5 - 8 ) | 7.0 ( 4 - 9 )                                                                                                                                                                    |  |  |                                                                        |  |  |                                                                                                                                                                                                                                                  |  |  |
| Stage III            | 19 | 6.0 ( 3 - 9 )                                                                                                                                                                                      | 5.0 ( 2 - 7 )   | 5.0 ( 3 - 7 ) |                                                                                                                                                           |             |               |                                                                                                                                                                                 |               | 1.0 ( 1 - 2 ) | 5.0 ( 1 - 7 )                                                                                                                                                                                                                                                                                                                           | 4.5 ( 1 - 7 ) | 5.0 ( 1 - 7 ) | 6.0 ( 2 - 9 )                                                                                                                                                                    |  |  |                                                                        |  |  |                                                                                                                                                                                                                                                  |  |  |
| Stage IV             | 20 | 1.5 ( 1 - 4 )                                                                                                                                                                                      | 1.0 ( 1 - 2 )   | 1.5 ( 1 - 3 ) |                                                                                                                                                           |             |               |                                                                                                                                                                                 |               |               |                                                                                                                                                                                                                                                                                                                                         |               |               |                                                                                                                                                                                  |  |  |                                                                        |  |  |                                                                                                                                                                                                                                                  |  |  |
| <b>Melanoma</b>      | 21 |                                                                                                                                                                                                    |                 |               |                                                                                                                                                           |             | 7.0 ( 4 - 9 ) | 8.0 ( 6 - 9 )                                                                                                                                                                   | 7.0 ( 6 - 9 ) |               |                                                                                                                                                                                                                                                                                                                                         |               |               |                                                                                                                                                                                  |  |  |                                                                        |  |  |                                                                                                                                                                                                                                                  |  |  |
| Stage I              | 22 | 9.0 ( 8 - 9 )                                                                                                                                                                                      | 9.0 ( 7 - 9 )   | 9.0 ( 8 - 9 ) |                                                                                                                                                           |             |               |                                                                                                                                                                                 |               | 3.0 ( 1 - 5 ) | 7.0 ( 2 - 9 )                                                                                                                                                                                                                                                                                                                           | 6.5 ( 2 - 9 ) | 7.0 ( 2 - 9 ) | 7.0 ( 2 - 9 )                                                                                                                                                                    |  |  |                                                                        |  |  |                                                                                                                                                                                                                                                  |  |  |
| Stage II             | 23 | 8.0 ( 7 - 8 )                                                                                                                                                                                      | 7.0 ( 5 - 8 )   | 7.0 ( 6 - 8 ) |                                                                                                                                                           |             |               |                                                                                                                                                                                 |               | 2.0 ( 1 - 4 ) | 5.0 ( 4 - 9 )                                                                                                                                                                                                                                                                                                                           | 5.0 ( 3 - 8 ) | 5.0 ( 3 - 8 ) | 6.0 ( 5 - 9 )                                                                                                                                                                    |  |  |                                                                        |  |  |                                                                                                                                                                                                                                                  |  |  |
| Stage III            | 24 | 5.0 ( 3 - 7 )                                                                                                                                                                                      | 3.5 ( 2 - 6 )   | 4.5 ( 3 - 6 ) |                                                                                                                                                           |             |               |                                                                                                                                                                                 |               | 1.0 ( 1 - 3 ) | 3.5 ( 3 - 7 )                                                                                                                                                                                                                                                                                                                           | 3.0 ( 2 - 7 ) | 4.0 ( 2 - 7 ) | 6.5 ( 3 - 8 )                                                                                                                                                                    |  |  |                                                                        |  |  |                                                                                                                                                                                                                                                  |  |  |
| Stage IV             | 25 | 2.0 ( 1 - 4 )                                                                                                                                                                                      | 1.0 ( 1 - 3 )   | 1.5 ( 1 - 3 ) |                                                                                                                                                           |             |               |                                                                                                                                                                                 |               |               |                                                                                                                                                                                                                                                                                                                                         |               |               |                                                                                                                                                                                  |  |  |                                                                        |  |  |                                                                                                                                                                                                                                                  |  |  |
| <b>Kidney</b>        | 26 |                                                                                                                                                                                                    |                 |               |                                                                                                                                                           |             | 5.5 ( 4 - 9 ) | 8.0 ( 4 - 9 )                                                                                                                                                                   | 7.0 ( 5 - 9 ) |               |                                                                                                                                                                                                                                                                                                                                         |               |               |                                                                                                                                                                                  |  |  |                                                                        |  |  |                                                                                                                                                                                                                                                  |  |  |
| Stage I              | 27 | 9.0 ( 8 - 9 )                                                                                                                                                                                      | 9.0 ( 4 - 9 )   | 9.0 ( 7 - 9 ) |                                                                                                                                                           |             |               |                                                                                                                                                                                 |               | 5.0 ( 1 - 7 ) | 7.0 ( 3 - 9 )                                                                                                                                                                                                                                                                                                                           | 7.0 ( 5 - 9 ) | 7.0 ( 5 - 9 ) | 7.0 ( 3 - 9 )                                                                                                                                                                    |  |  |                                                                        |  |  |                                                                                                                                                                                                                                                  |  |  |
| Stage II             | 28 | 8.0 ( 7 - 9 )                                                                                                                                                                                      | 7.0 ( 4 - 8 )   | 8.0 ( 6 - 9 ) |                                                                                                                                                           |             |               |                                                                                                                                                                                 |               | 3.0 ( 1 - 5 ) | 5.5 ( 4 - 9 )                                                                                                                                                                                                                                                                                                                           | 6.0 ( 4 - 9 ) | 6.0 ( 4 - 9 ) | 6.5 ( 5 - 9 )                                                                                                                                                                    |  |  |                                                                        |  |  |                                                                                                                                                                                                                                                  |  |  |
| Stage III            | 29 | 6.0 ( 3 - 7 )                                                                                                                                                                                      | 4.5 ( 2 - 7 )   | 5.5 ( 3 - 7 ) |                                                                                                                                                           |             |               |                                                                                                                                                                                 |               | 2.0 ( 1 - 2 ) | 4.5 ( 3 - 7 )                                                                                                                                                                                                                                                                                                                           | 5.0 ( 2 - 7 ) | 5.0 ( 2 - 8 ) | 6.0 ( 3 - 8 )                                                                                                                                                                    |  |  |                                                                        |  |  |                                                                                                                                                                                                                                                  |  |  |
| Stage IV             | 30 | 2.0 ( 1 - 3 )                                                                                                                                                                                      | 1.0 ( 1 - 2 )   | 1.5 ( 1 - 2 ) |                                                                                                                                                           |             |               |                                                                                                                                                                                 |               |               |                                                                                                                                                                                                                                                                                                                                         |               |               |                                                                                                                                                                                  |  |  |                                                                        |  |  |                                                                                                                                                                                                                                                  |  |  |
| <b>Head and Neck</b> | 31 |                                                                                                                                                                                                    |                 |               |                                                                                                                                                           |             | 7.5 ( 5 - 9 ) | 8.5 ( 4 - 9 )                                                                                                                                                                   | 8.0 ( 4 - 9 ) |               |                                                                                                                                                                                                                                                                                                                                         |               |               |                                                                                                                                                                                  |  |  |                                                                        |  |  |                                                                                                                                                                                                                                                  |  |  |
| Stage I              | 32 | 8.5 ( 7 - 9 )                                                                                                                                                                                      | 9.0 ( 5 - 9 )   | 9.0 ( 6 - 9 ) |                                                                                                                                                           |             |               |                                                                                                                                                                                 |               | 3.0 ( 2 - 6 ) | 7.0 ( 4 - 9 )                                                                                                                                                                                                                                                                                                                           | 6.5 ( 3 - 9 ) | 7.0 ( 3 - 9 ) | 7.0 ( 3 - 9 )                                                                                                                                                                    |  |  |                                                                        |  |  |                                                                                                                                                                                                                                                  |  |  |
| Stage II             | 33 | 8.0 ( 6 - 9 )                                                                                                                                                                                      | 7.0 ( 4 - 8 )   | 7.5 ( 5 - 9 ) |                                                                                                                                                           |             |               |                                                                                                                                                                                 |               | 2.0 ( 1 - 4 ) | 5.5 ( 3 - 8 )                                                                                                                                                                                                                                                                                                                           | 5.5 ( 2 - 8 ) | 6.0 ( 2 - 8 ) | 6.0 ( 2 - 9 )                                                                                                                                                                    |  |  |                                                                        |  |  |                                                                                                                                                                                                                                                  |  |  |
| Stage III            | 34 | 6.5 ( 3 - 9 )                                                                                                                                                                                      | 4.5 ( 3 - 7 )   | 5.0 ( 3 - 8 ) |                                                                                                                                                           |             |               |                                                                                                                                                                                 |               | 1.0 ( 1 - 2 ) | 3.0 ( 2 - 7 )                                                                                                                                                                                                                                                                                                                           | 3.0 ( 1 - 7 ) | 4.5 ( 1 - 7 ) | 5.5 ( 1 - 8 )                                                                                                                                                                    |  |  |                                                                        |  |  |                                                                                                                                                                                                                                                  |  |  |
| Stage IV             | 35 | 4.0 ( 1 - 8 )                                                                                                                                                                                      | 2.0 ( 1 - 6 )   | 3.0 ( 1 - 8 ) |                                                                                                                                                           |             |               |                                                                                                                                                                                 |               |               |                                                                                                                                                                                                                                                                                                                                         |               |               |                                                                                                                                                                                  |  |  |                                                                        |  |  |                                                                                                                                                                                                                                                  |  |  |
| <b>Uterus</b>        | 36 |                                                                                                                                                                                                    |                 |               |                                                                                                                                                           |             | 6.5 ( 3 - 9 ) | 8.0 ( 6 - 9 )                                                                                                                                                                   | 7.0 ( 5 - 9 ) |               |                                                                                                                                                                                                                                                                                                                                         |               |               |                                                                                                                                                                                  |  |  |                                                                        |  |  |                                                                                                                                                                                                                                                  |  |  |
| Stage I              | 37 | 9.0 ( 8 - 9 )                                                                                                                                                                                      | 8.5 ( 7 - 9 )   | 9.0 ( 8 - 9 ) |                                                                                                                                                           |             |               |                                                                                                                                                                                 |               | 4.0 ( 3 - 6 ) | 6.0 ( 2 - 9 )                                                                                                                                                                                                                                                                                                                           | 6.5 ( 2 - 9 ) | 7.0 ( 2 - 9 ) | 7.0 ( 2 - 9 )                                                                                                                                                                    |  |  |                                                                        |  |  |                                                                                                                                                                                                                                                  |  |  |
| Stage II             | 38 | 8.0 ( 7 - 9 )                                                                                                                                                                                      | 7.0 ( 5 - 9 )   | 8.0 ( 7 - 9 ) |                                                                                                                                                           |             |               |                                                                                                                                                                                 |               | 3.0 ( 1 - 5 ) | 5.0 ( 3 - 8 )                                                                                                                                                                                                                                                                                                                           | 5.0 ( 3 - 8 ) | 5.0 ( 4 - 9 ) | 6.0 ( 4 - 9 )                                                                                                                                                                    |  |  |                                                                        |  |  |                                                                                                                                                                                                                                                  |  |  |
| Stage III            | 39 | 6.0 ( 5 - 9 )                                                                                                                                                                                      | 5.0 ( 4 - 8 )   | 5.5 ( 5 - 8 ) |                                                                                                                                                           |             |               |                                                                                                                                                                                 |               | 1.5 ( 1 - 3 ) | 4.0 ( 3 - 7 )                                                                                                                                                                                                                                                                                                                           | 4.5 ( 2 - 7 ) | 4.0 ( 2 - 7 ) | 5.0 ( 3 - 8 )                                                                                                                                                                    |  |  |                                                                        |  |  |                                                                                                                                                                                                                                                  |  |  |
| Stage IV             | 40 | 1.5 ( 1 - 4 )                                                                                                                                                                                      | 1.0 ( 1 - 2 )   | 1.0 ( 1 - 3 ) |                                                                                                                                                           |             |               |                                                                                                                                                                                 |               |               |                                                                                                                                                                                                                                                                                                                                         |               |               |                                                                                                                                                                                  |  |  |                                                                        |  |  |                                                                                                                                                                                                                                                  |  |  |
| <b>Pancreas</b>      | 41 |                                                                                                                                                                                                    |                 |               |                                                                                                                                                           |             |               |                                                                                                                                                                                 |               |               |                                                                                                                                                                                                                                                                                                                                         |               |               |                                                                                                                                                                                  |  |  |                                                                        |  |  |                                                                                                                                                                                                                                                  |  |  |
| Stage I              | 42 |                                                                                                                                                                                                    |                 | 4.0 ( 2 - 7 ) |                                                                                                                                                           |             |               |                                                                                                                                                                                 |               | 1.0 ( 1 - 2 ) | 5.5 ( 5 - 9 )                                                                                                                                                                                                                                                                                                                           | 5.0 ( 3 - 9 ) | 5.5 ( 4 - 9 ) | 6.5 ( 4 - 9 )                                                                                                                                                                    |  |  |                                                                        |  |  |                                                                                                                                                                                                                                                  |  |  |
| Stage II             | 43 |                                                                                                                                                                                                    |                 | 2.5 ( 1 - 5 ) |                                                                                                                                                           |             |               |                                                                                                                                                                                 |               | 1.0 ( 1 - 2 ) | 4.0 ( 2 - 9 )                                                                                                                                                                                                                                                                                                                           | 3.0 ( 1 - 9 ) | 3.0 ( 2 - 9 ) | 5.5 ( 2 - 9 )                                                                                                                                                                    |  |  |                                                                        |  |  |                                                                                                                                                                                                                                                  |  |  |
| Stage III            | 44 |                                                                                                                                                                                                    |                 | 1.0 ( 1 - 3 ) |                                                                                                                                                           |             |               |                                                                                                                                                                                 |               | 1.0 ( 1 - 1 ) | 2.0 ( 1 - 9 )                                                                                                                                                                                                                                                                                                                           | 1.5 ( 1 - 9 ) | 2.0 ( 1 - 9 ) | 3.5 ( 1 - 9 )                                                                                                                                                                    |  |  |                                                                        |  |  |                                                                                                                                                                                                                                                  |  |  |
| Stage IV             | 45 |                                                                                                                                                                                                    |                 | 1.0 ( 1 - 1 ) |                                                                                                                                                           |             |               |                                                                                                                                                                                 |               |               |                                                                                                                                                                                                                                                                                                                                         |               |               |                                                                                                                                                                                  |  |  |                                                                        |  |  |                                                                                                                                                                                                                                                  |  |  |

|                                                                                                                                                                                                                                                                                                                                                        | Q1: What is the likelihood that patients diagnosed with this cancer at this stage today will be cured [1] with <b>typical treatment</b> [2]? |                 |               | Q2: What is the likelihood that <b>untreated patients</b> with stage I or II of this cancer will progress to stage III or IV disease over their lifetime? |               |               | Q3: How long does it take this cancer to progress from the beginning of this stage [3] to the beginning of the next stage in undiagnosed patients (natural history of disease)? |               |               | Q4: ... <b>life expectancy</b> increase in all patients with this cancer, relative to life expectancy without the screening test [6]? |               |               | Q5: Assume patients are receiving <b>typical treatment</b> . ... <b>cure rates</b> increase in all patients with this cancer, relative to cure rates without the screening test? |               |               | Q6: Assume patients are receiving <b>best available treatment</b> [7]. |               |               | Q7: If all cancers of this type were diagnosed no later than this stage, to what extent would <b>cure rates</b> increase with <b>typical treatment</b> in all patients with this cancer, relative to 2030 cure rates without the screening test? |  |  |
|--------------------------------------------------------------------------------------------------------------------------------------------------------------------------------------------------------------------------------------------------------------------------------------------------------------------------------------------------------|----------------------------------------------------------------------------------------------------------------------------------------------|-----------------|---------------|-----------------------------------------------------------------------------------------------------------------------------------------------------------|---------------|---------------|---------------------------------------------------------------------------------------------------------------------------------------------------------------------------------|---------------|---------------|---------------------------------------------------------------------------------------------------------------------------------------|---------------|---------------|----------------------------------------------------------------------------------------------------------------------------------------------------------------------------------|---------------|---------------|------------------------------------------------------------------------|---------------|---------------|--------------------------------------------------------------------------------------------------------------------------------------------------------------------------------------------------------------------------------------------------|--|--|
|                                                                                                                                                                                                                                                                                                                                                        | Please enter a rating in each yellow cell, where each cell represents a cancer or cancer stage.                                              |                 |               |                                                                                                                                                           |               |               |                                                                                                                                                                                 |               |               |                                                                                                                                       |               |               |                                                                                                                                                                                  |               |               |                                                                        |               |               |                                                                                                                                                                                                                                                  |  |  |
|                                                                                                                                                                                                                                                                                                                                                        | If there is heterogeneity within a category, do your best to imagine a <b>typical</b> patient.                                               |                 |               |                                                                                                                                                           |               |               |                                                                                                                                                                                 |               |               |                                                                                                                                       |               |               |                                                                                                                                                                                  |               |               |                                                                        |               |               |                                                                                                                                                                                                                                                  |  |  |
| For columns <b>A</b> through <b>F</b> , enter a rating of 1 through 9, where:<br>1=Extremely unlikely<br>3=Somewhat unlikely<br>5=Neutral, neither likely nor unlikely<br>7=Somewhat likely<br>9=Extremely likely                                                                                                                                      |                                                                                                                                              |                 |               |                                                                                                                                                           |               |               |                                                                                                                                                                                 |               |               |                                                                                                                                       |               |               |                                                                                                                                                                                  |               |               |                                                                        |               |               |                                                                                                                                                                                                                                                  |  |  |
| For column <b>G</b> , enter a rating of 1 through 9, where:<br>1=Less than 1 year<br>5=5 years<br>9=9 or more years                                                                                                                                                                                                                                    |                                                                                                                                              |                 |               |                                                                                                                                                           |               |               |                                                                                                                                                                                 |               |               |                                                                                                                                       |               |               |                                                                                                                                                                                  |               |               |                                                                        |               |               |                                                                                                                                                                                                                                                  |  |  |
| For columns <b>H</b> through <b>K</b> , enter a rating of 1 through 9, where your answer reflects your judgement about how much the outcome of interest (e.g., life expectancy in Q4 and cure rates in Q5, Q6, Q7) would increase:<br>1=Not at all<br>3=Slightly<br>5=Moderately<br>7=Considerably<br>9=A great deal, doubling the outcome of interest |                                                                                                                                              |                 |               |                                                                                                                                                           |               |               |                                                                                                                                                                                 |               |               |                                                                                                                                       |               |               |                                                                                                                                                                                  |               |               |                                                                        |               |               |                                                                                                                                                                                                                                                  |  |  |
|                                                                                                                                                                                                                                                                                                                                                        | Lower risk [8]                                                                                                                               | Higher risk [9] | Overall       | Lower risk                                                                                                                                                | Higher risk   | Overall       | Overall                                                                                                                                                                         | Overall       | Overall       | Overall                                                                                                                               | Overall       | Overall       | Overall                                                                                                                                                                          | Overall       | Overall       | Overall                                                                | Overall       | Overall       |                                                                                                                                                                                                                                                  |  |  |
|                                                                                                                                                                                                                                                                                                                                                        | A                                                                                                                                            | B               | C             | D                                                                                                                                                         | E             | F             | G                                                                                                                                                                               | H             | I             | J                                                                                                                                     | K             |               |                                                                                                                                                                                  |               |               |                                                                        |               |               |                                                                                                                                                                                                                                                  |  |  |
| <b>Thyroid</b>                                                                                                                                                                                                                                                                                                                                         | 46                                                                                                                                           |                 |               | 4.0 ( 1 - 9 )                                                                                                                                             | 7.5 ( 6 - 9 ) | 5.0 ( 2 - 8 ) |                                                                                                                                                                                 |               |               |                                                                                                                                       |               |               |                                                                                                                                                                                  |               |               |                                                                        |               |               |                                                                                                                                                                                                                                                  |  |  |
| Stage I                                                                                                                                                                                                                                                                                                                                                | 47                                                                                                                                           | 9.0 ( 9 - 9 )   | 6.5 ( 1 - 9 ) | 9.0 ( 8 - 9 )                                                                                                                                             |               |               | 6.0 ( 4 - 8 )                                                                                                                                                                   | 3.0 ( 1 - 7 ) | 3.0 ( 1 - 7 ) | 3.0 ( 1 - 7 )                                                                                                                         | 3.0 ( 1 - 7 ) | 3.0 ( 1 - 7 ) | 3.0 ( 1 - 7 )                                                                                                                                                                    | 3.0 ( 1 - 7 ) | 3.0 ( 1 - 7 ) | 3.0 ( 1 - 7 )                                                          | 3.0 ( 1 - 7 ) | 3.0 ( 1 - 7 ) |                                                                                                                                                                                                                                                  |  |  |
| Stage II                                                                                                                                                                                                                                                                                                                                               | 48                                                                                                                                           | 9.0 ( 7 - 9 )   | 5.0 ( 1 - 9 ) | 8.5 ( 7 - 9 )                                                                                                                                             |               |               | 5.0 ( 3 - 7 )                                                                                                                                                                   | 3.0 ( 1 - 5 ) | 3.0 ( 1 - 5 ) | 3.0 ( 1 - 5 )                                                                                                                         | 3.0 ( 1 - 5 ) | 3.0 ( 1 - 5 ) | 3.0 ( 1 - 5 )                                                                                                                                                                    | 3.0 ( 1 - 5 ) | 3.0 ( 1 - 5 ) | 3.0 ( 1 - 5 )                                                          | 3.0 ( 1 - 5 ) | 3.0 ( 1 - 5 ) |                                                                                                                                                                                                                                                  |  |  |
| Stage III                                                                                                                                                                                                                                                                                                                                              | 49                                                                                                                                           | 8.5 ( 4 - 9 )   | 3.0 ( 1 - 9 ) | 7.0 ( 4 - 9 )                                                                                                                                             |               |               | 4.0 ( 2 - 5 )                                                                                                                                                                   | 3.0 ( 2 - 5 ) | 3.0 ( 1 - 5 ) | 3.0 ( 1 - 5 )                                                                                                                         | 3.0 ( 1 - 5 ) | 3.0 ( 1 - 5 ) | 3.0 ( 1 - 5 )                                                                                                                                                                    | 3.0 ( 1 - 5 ) | 3.0 ( 1 - 5 ) | 3.0 ( 1 - 5 )                                                          | 3.0 ( 1 - 5 ) | 3.0 ( 1 - 5 ) |                                                                                                                                                                                                                                                  |  |  |
| Stage IV                                                                                                                                                                                                                                                                                                                                               | 50                                                                                                                                           | 6.0 ( 1 - 9 )   | 1.0 ( 1 - 5 ) | 5.0 ( 1 - 7 )                                                                                                                                             |               |               |                                                                                                                                                                                 |               |               |                                                                                                                                       |               |               |                                                                                                                                                                                  |               |               |                                                                        |               |               |                                                                                                                                                                                                                                                  |  |  |
| <b>Bladder</b>                                                                                                                                                                                                                                                                                                                                         | 51                                                                                                                                           |                 |               |                                                                                                                                                           |               | 7.5 ( 5 - 9 ) |                                                                                                                                                                                 |               |               |                                                                                                                                       |               |               |                                                                                                                                                                                  |               |               |                                                                        |               |               |                                                                                                                                                                                                                                                  |  |  |
| Stage I                                                                                                                                                                                                                                                                                                                                                | 52                                                                                                                                           |                 |               | 8.5 ( 7 - 9 )                                                                                                                                             |               |               | 3.0 ( 2 - 5 )                                                                                                                                                                   | 6.0 ( 5 - 8 ) | 6.0 ( 5 - 8 ) | 6.0 ( 5 - 8 )                                                                                                                         | 6.0 ( 5 - 8 ) | 6.0 ( 5 - 8 ) | 6.0 ( 5 - 8 )                                                                                                                                                                    | 6.0 ( 5 - 8 ) | 6.0 ( 5 - 8 ) | 6.0 ( 5 - 8 )                                                          | 6.0 ( 5 - 8 ) | 6.0 ( 5 - 8 ) |                                                                                                                                                                                                                                                  |  |  |
| Stage II                                                                                                                                                                                                                                                                                                                                               | 53                                                                                                                                           |                 |               | 6.5 ( 6 - 8 )                                                                                                                                             |               |               | 2.0 ( 1 - 5 )                                                                                                                                                                   | 5.0 ( 4 - 7 ) | 4.5 ( 3 - 7 ) | 5.0 ( 4 - 7 )                                                                                                                         | 5.0 ( 4 - 7 ) | 5.0 ( 4 - 7 ) | 5.0 ( 4 - 7 )                                                                                                                                                                    | 5.0 ( 4 - 7 ) | 5.0 ( 4 - 7 ) | 5.0 ( 4 - 7 )                                                          | 5.0 ( 4 - 7 ) | 5.0 ( 4 - 7 ) |                                                                                                                                                                                                                                                  |  |  |
| Stage III                                                                                                                                                                                                                                                                                                                                              | 54                                                                                                                                           |                 |               | 4.0 ( 3 - 5 )                                                                                                                                             |               |               | 1.0 ( 1 - 2 )                                                                                                                                                                   | 3.0 ( 2 - 7 ) | 3.0 ( 2 - 5 ) | 3.0 ( 2 - 5 )                                                                                                                         | 3.0 ( 2 - 5 ) | 3.0 ( 2 - 5 ) | 3.0 ( 2 - 5 )                                                                                                                                                                    | 3.0 ( 2 - 5 ) | 3.0 ( 2 - 5 ) | 3.0 ( 2 - 5 )                                                          | 3.0 ( 2 - 5 ) | 3.0 ( 2 - 5 ) |                                                                                                                                                                                                                                                  |  |  |
| Stage IV                                                                                                                                                                                                                                                                                                                                               | 55                                                                                                                                           |                 |               | 1.0 ( 1 - 2 )                                                                                                                                             |               |               |                                                                                                                                                                                 |               |               |                                                                                                                                       |               |               |                                                                                                                                                                                  |               |               |                                                                        |               |               |                                                                                                                                                                                                                                                  |  |  |
| <b>Liver/Intrahepatic Bile-duct</b>                                                                                                                                                                                                                                                                                                                    | 56                                                                                                                                           |                 |               |                                                                                                                                                           | 7.5 ( 3 - 9 ) | 8.0 ( 2 - 9 ) | 7.5 ( 2 - 9 )                                                                                                                                                                   |               |               |                                                                                                                                       |               |               |                                                                                                                                                                                  |               |               |                                                                        |               |               |                                                                                                                                                                                                                                                  |  |  |
| Stage I                                                                                                                                                                                                                                                                                                                                                | 57                                                                                                                                           | 5.0 ( 3 - 8 )   | 3.5 ( 1 - 7 ) | 4.0 ( 2 - 8 )                                                                                                                                             |               |               | 2.0 ( 1 - 4 )                                                                                                                                                                   | 7.0 ( 3 - 7 ) | 6.0 ( 3 - 7 ) | 6.5 ( 3 - 7 )                                                                                                                         | 6.5 ( 3 - 7 ) | 6.5 ( 3 - 7 ) | 6.5 ( 3 - 7 )                                                                                                                                                                    | 6.5 ( 3 - 7 ) | 6.5 ( 3 - 7 ) | 6.5 ( 3 - 7 )                                                          | 6.5 ( 3 - 7 ) | 6.5 ( 3 - 7 ) |                                                                                                                                                                                                                                                  |  |  |
| Stage II                                                                                                                                                                                                                                                                                                                                               | 58                                                                                                                                           | 3.5 ( 2 - 7 )   | 2.5 ( 1 - 7 ) | 3.0 ( 2 - 7 )                                                                                                                                             |               |               | 1.0 ( 1 - 2 )                                                                                                                                                                   | 5.0 ( 2 - 7 ) | 5.0 ( 2 - 7 ) | 5.0 ( 2 - 7 )                                                                                                                         | 5.0 ( 2 - 7 ) | 5.0 ( 2 - 7 ) | 5.0 ( 2 - 7 )                                                                                                                                                                    | 5.0 ( 2 - 7 ) | 5.0 ( 2 - 7 ) | 5.0 ( 2 - 7 )                                                          | 5.0 ( 2 - 7 ) | 5.0 ( 2 - 7 ) |                                                                                                                                                                                                                                                  |  |  |
| Stage III                                                                                                                                                                                                                                                                                                                                              | 59                                                                                                                                           | 2.0 ( 1 - 5 )   | 1.0 ( 1 - 5 ) | 1.5 ( 1 - 5 )                                                                                                                                             |               |               | 1.0 ( 1 - 2 )                                                                                                                                                                   | 2.5 ( 1 - 7 ) | 2.5 ( 1 - 7 ) | 2.5 ( 1 - 7 )                                                                                                                         | 2.5 ( 1 - 7 ) | 2.5 ( 1 - 7 ) | 2.5 ( 1 - 7 )                                                                                                                                                                    | 2.5 ( 1 - 7 ) | 2.5 ( 1 - 7 ) | 2.5 ( 1 - 7 )                                                          | 2.5 ( 1 - 7 ) | 2.5 ( 1 - 7 ) |                                                                                                                                                                                                                                                  |  |  |
| Stage IV                                                                                                                                                                                                                                                                                                                                               | 60                                                                                                                                           | 1.0 ( 1 - 1 )   | 1.0 ( 1 - 1 ) | 1.0 ( 1 - 1 )                                                                                                                                             |               |               |                                                                                                                                                                                 |               |               |                                                                                                                                       |               |               |                                                                                                                                                                                  |               |               |                                                                        |               |               |                                                                                                                                                                                                                                                  |  |  |
| <b>Ovary</b>                                                                                                                                                                                                                                                                                                                                           | 61                                                                                                                                           |                 |               |                                                                                                                                                           | 7.0 ( 5 - 9 ) | 8.0 ( 3 - 9 ) | 8.0 ( 4 - 9 )                                                                                                                                                                   |               |               |                                                                                                                                       |               |               |                                                                                                                                                                                  |               |               |                                                                        |               |               |                                                                                                                                                                                                                                                  |  |  |
| Stage I                                                                                                                                                                                                                                                                                                                                                | 62                                                                                                                                           | 9.0 ( 6 - 9 )   | 8.0 ( 3 - 8 ) | 8.0 ( 6 - 9 )                                                                                                                                             |               |               | 3.0 ( 1 - 4 )                                                                                                                                                                   | 7.5 ( 6 - 9 ) | 7.0 ( 5 - 9 ) | 7.0 ( 6 - 9 )                                                                                                                         | 7.0 ( 6 - 9 ) | 7.0 ( 6 - 9 ) | 7.0 ( 6 - 9 )                                                                                                                                                                    | 7.0 ( 6 - 9 ) | 7.0 ( 6 - 9 ) | 7.0 ( 6 - 9 )                                                          | 7.0 ( 6 - 9 ) | 7.0 ( 6 - 9 ) |                                                                                                                                                                                                                                                  |  |  |
| Stage II                                                                                                                                                                                                                                                                                                                                               | 63                                                                                                                                           | 8.0 ( 4 - 9 )   | 6.0 ( 3 - 7 ) | 7.0 ( 4 - 8 )                                                                                                                                             |               |               | 2.0 ( 1 - 3 )                                                                                                                                                                   | 6.5 ( 5 - 9 ) | 5.5 ( 4 - 8 ) | 6.0 ( 5 - 8 )                                                                                                                         | 6.0 ( 5 - 8 ) | 6.0 ( 5 - 8 ) | 6.0 ( 5 - 8 )                                                                                                                                                                    | 6.0 ( 5 - 8 ) | 6.0 ( 5 - 8 ) | 6.0 ( 5 - 8 )                                                          | 6.0 ( 5 - 8 ) | 6.0 ( 5 - 8 ) |                                                                                                                                                                                                                                                  |  |  |
| Stage III                                                                                                                                                                                                                                                                                                                                              | 64                                                                                                                                           | 6.5 ( 1 - 9 )   | 2.0 ( 1 - 4 ) | 3.0 ( 1 - 5 )                                                                                                                                             |               |               | 1.0 ( 1 - 2 )                                                                                                                                                                   | 3.0 ( 1 - 7 ) | 3.0 ( 1 - 7 ) | 3.0 ( 1 - 7 )                                                                                                                         | 3.0 ( 1 - 7 ) | 3.0 ( 1 - 7 ) | 3.0 ( 1 - 7 )                                                                                                                                                                    | 3.0 ( 1 - 7 ) | 3.0 ( 1 - 7 ) | 3.0 ( 1 - 7 )                                                          | 3.0 ( 1 - 7 ) | 3.0 ( 1 - 7 ) |                                                                                                                                                                                                                                                  |  |  |
| Stage IV                                                                                                                                                                                                                                                                                                                                               | 65                                                                                                                                           | 4.0 ( 1 - 9 )   | 1.0 ( 1 - 2 ) | 1.0 ( 1 - 3 )                                                                                                                                             |               |               |                                                                                                                                                                                 |               |               |                                                                                                                                       |               |               |                                                                                                                                                                                  |               |               |                                                                        |               |               |                                                                                                                                                                                                                                                  |  |  |
| <b>Stomach</b>                                                                                                                                                                                                                                                                                                                                         | 66                                                                                                                                           |                 |               |                                                                                                                                                           | 7.5 ( 4 - 9 ) | 9.0 ( 2 - 9 ) | 8.0 ( 2 - 9 )                                                                                                                                                                   |               |               |                                                                                                                                       |               |               |                                                                                                                                                                                  |               |               |                                                                        |               |               |                                                                                                                                                                                                                                                  |  |  |
| Stage I                                                                                                                                                                                                                                                                                                                                                | 67                                                                                                                                           | 8.0 ( 6 - 9 )   | 7.0 ( 4 - 7 ) | 7.0 ( 5 - 8 )                                                                                                                                             |               |               | 3.0 ( 2 - 5 )                                                                                                                                                                   | 7.5 ( 5 - 9 ) | 7.0 ( 4 - 9 ) | 7.0 ( 5 - 9 )                                                                                                                         | 7.0 ( 5 - 9 ) | 7.0 ( 5 - 9 ) | 7.0 ( 5 - 9 )                                                                                                                                                                    | 7.0 ( 5 - 9 ) | 7.0 ( 5 - 9 ) | 7.0 ( 5 - 9 )                                                          | 7.0 ( 5 - 9 ) | 7.0 ( 5 - 9 ) |                                                                                                                                                                                                                                                  |  |  |
| Stage II                                                                                                                                                                                                                                                                                                                                               | 68                                                                                                                                           | 5.0 ( 4 - 7 )   | 4.0 ( 3 - 6 ) | 4.5 ( 3 - 7 )                                                                                                                                             |               |               | 1.5 ( 1 - 3 )                                                                                                                                                                   | 5.0 ( 4 - 9 ) | 5.0 ( 3 - 9 ) | 5.5 ( 4 - 9 )                                                                                                                         | 5.5 ( 4 - 9 ) | 5.5 ( 4 - 9 ) | 5.5 ( 4 - 9 )                                                                                                                                                                    | 5.5 ( 4 - 9 ) | 5.5 ( 4 - 9 ) | 5.5 ( 4 - 9 )                                                          | 5.5 ( 4 - 9 ) | 5.5 ( 4 - 9 ) |                                                                                                                                                                                                                                                  |  |  |
| Stage III                                                                                                                                                                                                                                                                                                                                              | 69                                                                                                                                           | 3.0 ( 1 - 6 )   | 2.0 ( 1 - 4 ) | 2.0 ( 1 - 5 )                                                                                                                                             |               |               | 1.0 ( 1 - 2 )                                                                                                                                                                   | 3.0 ( 2 - 9 ) | 3.0 ( 1 - 9 ) | 3.0 ( 2 - 9 )                                                                                                                         | 3.0 ( 2 - 9 ) | 3.0 ( 2 - 9 ) | 3.0 ( 2 - 9 )                                                                                                                                                                    | 3.0 ( 2 - 9 ) | 3.0 ( 2 - 9 ) | 3.0 ( 2 - 9 )                                                          | 3.0 ( 2 - 9 ) | 3.0 ( 2 - 9 ) |                                                                                                                                                                                                                                                  |  |  |
| Stage IV                                                                                                                                                                                                                                                                                                                                               | 70                                                                                                                                           | 1.0 ( 1 - 2 )   | 1.0 ( 1 - 1 ) | 1.0 ( 1 - 1 )                                                                                                                                             |               |               |                                                                                                                                                                                 |               |               |                                                                                                                                       |               |               |                                                                                                                                                                                  |               |               |                                                                        |               |               |                                                                                                                                                                                                                                                  |  |  |
| <b>Esophagus</b>                                                                                                                                                                                                                                                                                                                                       | 71                                                                                                                                           |                 |               |                                                                                                                                                           | 7.5 ( 4 - 9 ) | 9.0 ( 2 - 9 ) | 8.0 ( 2 - 9 )                                                                                                                                                                   |               |               |                                                                                                                                       |               |               |                                                                                                                                                                                  |               |               |                                                                        |               |               |                                                                                                                                                                                                                                                  |  |  |
| Stage I                                                                                                                                                                                                                                                                                                                                                | 72                                                                                                                                           | 7.5 ( 4 - 9 )   | 6.0 ( 4 - 7 ) | 7.0 ( 4 - 8 )                                                                                                                                             |               |               | 2.0 ( 2 - 5 )                                                                                                                                                                   | 7.0 ( 5 - 9 ) | 7.0 ( 4 - 9 ) | 7.0 ( 5 - 9 )                                                                                                                         | 7.0 ( 5 - 9 ) | 7.0 ( 5 - 9 ) | 7.0 ( 5 - 9 )                                                                                                                                                                    | 7.0 ( 5 - 9 ) | 7.0 ( 5 - 9 ) | 7.0 ( 5 - 9 )                                                          | 7.0 ( 5 - 9 ) | 7.0 ( 5 - 9 ) |                                                                                                                                                                                                                                                  |  |  |
| Stage II                                                                                                                                                                                                                                                                                                                                               | 73                                                                                                                                           | 4.5 ( 2 - 7 )   | 3.5 ( 3 - 6 ) | 4.0 ( 3 - 7 )                                                                                                                                             |               |               | 1.0 ( 1 - 2 )                                                                                                                                                                   | 5.0 ( 4 - 9 ) | 5.0 ( 3 - 9 ) | 5.0 ( 4 - 9 )                                                                                                                         | 5.0 ( 4 - 9 ) | 5.0 ( 4 - 9 ) | 5.0 ( 4 - 9 )                                                                                                                                                                    | 5.0 ( 4 - 9 ) | 5.0 ( 4 - 9 ) | 5.0 ( 4 - 9 )                                                          | 5.0 ( 4 - 9 ) | 5.0 ( 4 - 9 ) |                                                                                                                                                                                                                                                  |  |  |
| Stage III                                                                                                                                                                                                                                                                                                                                              | 74                                                                                                                                           | 2.5 ( 1 - 6 )   | 2.0 ( 1 - 4 ) | 2.0 ( 1 - 5 )                                                                                                                                             |               |               | 1.0 ( 1 - 2 )                                                                                                                                                                   | 2.5 ( 2 - 9 ) | 2.5 ( 1 - 9 ) | 2.5 ( 1 - 9 )                                                                                                                         | 2.5 ( 1 - 9 ) | 2.5 ( 1 - 9 ) | 2.5 ( 1 - 9 )                                                                                                                                                                    | 2.5 ( 1 - 9 ) | 2.5 ( 1 - 9 ) | 2.5 ( 1 - 9 )                                                          | 2.5 ( 1 - 9 ) | 2.5 ( 1 - 9 ) |                                                                                                                                                                                                                                                  |  |  |
| Stage IV                                                                                                                                                                                                                                                                                                                                               | 75                                                                                                                                           | 1.0 ( 1 - 2 )   | 1.0 ( 1 - 1 ) | 1.0 ( 1 - 1 )                                                                                                                                             |               |               |                                                                                                                                                                                 |               |               |                                                                                                                                       |               |               |                                                                                                                                                                                  |               |               |                                                                        |               |               |                                                                                                                                                                                                                                                  |  |  |



SECTION 2

TABLE 2. HEMATOLOGIC CANCERS: LYMPHOMA

|                                                                                                                                                                                                              |                                                                                                                                                                                                                                                                                                     |                 |                  |                                                                                                                                                                  |               |               |                                                                                                                                                                                         |               |               |                                                                                                                                                                                                                                                                                                                                                                                                                                                                                                                                                                                                                                                                                                                                                                                                                                                                                                                                                                                                                                                                                                                                          |               |         |                                                                                                                                                                                                                                                                                                                                                                                                                                          |  |  |  |  |  |
|--------------------------------------------------------------------------------------------------------------------------------------------------------------------------------------------------------------|-----------------------------------------------------------------------------------------------------------------------------------------------------------------------------------------------------------------------------------------------------------------------------------------------------|-----------------|------------------|------------------------------------------------------------------------------------------------------------------------------------------------------------------|---------------|---------------|-----------------------------------------------------------------------------------------------------------------------------------------------------------------------------------------|---------------|---------------|------------------------------------------------------------------------------------------------------------------------------------------------------------------------------------------------------------------------------------------------------------------------------------------------------------------------------------------------------------------------------------------------------------------------------------------------------------------------------------------------------------------------------------------------------------------------------------------------------------------------------------------------------------------------------------------------------------------------------------------------------------------------------------------------------------------------------------------------------------------------------------------------------------------------------------------------------------------------------------------------------------------------------------------------------------------------------------------------------------------------------------------|---------------|---------|------------------------------------------------------------------------------------------------------------------------------------------------------------------------------------------------------------------------------------------------------------------------------------------------------------------------------------------------------------------------------------------------------------------------------------------|--|--|--|--|--|
| <p>Please enter a rating in each yellow cell, where each cell represents a cancer or cancer stage.</p> <p>If there is heterogeneity within a category, do your best to imagine a <b>typical</b> patient.</p> | <p>Q1: What is the likelihood that patients diagnosed with this cancer at this stage today will be cured [10] with <b>typical treatment</b> [11]?</p>                                                                                                                                               |                 |                  | <p>Q2: What is the likelihood that <b>untreated patients</b> with stage I or II of this cancer will progress to stage III or IV disease over their lifetime?</p> |               |               | <p>Q3: How long does it take this cancer to progress from the beginning of this stage [12] to the beginning of the next stage in undiagnosed patients (natural history of disease)?</p> |               |               | <p>Imagine an annual hypothetical screening blood test for patients ≥50 years of age that is 100% sensitive and 100% specific for the stage of cancer you are being asked to rate. Assume this test cannot differentiate between higher and lower risk cancers.</p> <p>If all cancers of this type were diagnosed no later than the stage [13] indicated by the row heading, to what extent would...</p> <p>Q4: ...<b>life expectancy</b> increase in all patients with this cancer, relative to life expectancy without the screening test [15]?</p> <p>Assume patients are receiving <b>typical treatment</b>.</p> <p>Q5: Assume patients are receiving <b>typical treatment</b>.</p> <p>Q6: Assume patients are receiving <b>best available treatment</b> [16].</p> <p>Now consider what medical practice might be like in 2030 [14] with cure rates higher than today's.</p> <p>Q7: If all cancers of this type were diagnosed no later than this stage, to what extent would <b>cure rates</b> increase with <b>typical treatment</b> in all patients with this cancer, relative to 2030 cure rates without the screening test?</p> |               |         |                                                                                                                                                                                                                                                                                                                                                                                                                                          |  |  |  |  |  |
|                                                                                                                                                                                                              | <p>For columns <b>A</b> through <b>F</b>, enter a rating of 1 through 9, where:</p> <p>1=Extremely unlikely<br/>                 3=Somewhat unlikely<br/>                 5=Neutral, neither likely nor unlikely<br/>                 7=Somewhat likely<br/>                 9=Extremely likely</p> |                 |                  |                                                                                                                                                                  |               |               |                                                                                                                                                                                         |               |               | <p>For column <b>G</b>, enter a rating of 1 through 9, where:</p> <p>1=Less than 1 year<br/>                 5=5 years<br/>                 9=9 or more years</p>                                                                                                                                                                                                                                                                                                                                                                                                                                                                                                                                                                                                                                                                                                                                                                                                                                                                                                                                                                        |               |         | <p>For columns <b>H</b> through <b>K</b>, enter a rating of 1 through 9, where your answer reflects your judgement about how much the outcome of interest (e.g., life expectancy in Q4 and cure rates in Q5, Q6, Q7) would increase:</p> <p>1=Not at all<br/>                 3=Slightly<br/>                 5=Moderately<br/>                 7=Considerably<br/>                 9=A great deal, doubling the outcome of interest</p> |  |  |  |  |  |
|                                                                                                                                                                                                              |                                                                                                                                                                                                                                                                                                     | Lower risk [17] | Higher risk [18] | Overall                                                                                                                                                          | Lower risk    | Higher risk   | Overall                                                                                                                                                                                 | Overall       | Overall       | Overall                                                                                                                                                                                                                                                                                                                                                                                                                                                                                                                                                                                                                                                                                                                                                                                                                                                                                                                                                                                                                                                                                                                                  | Overall       | Overall |                                                                                                                                                                                                                                                                                                                                                                                                                                          |  |  |  |  |  |
|                                                                                                                                                                                                              | <b>A</b>                                                                                                                                                                                                                                                                                            | <b>B</b>        | <b>C</b>         | <b>D</b>                                                                                                                                                         | <b>E</b>      | <b>F</b>      | <b>G</b>                                                                                                                                                                                | <b>H</b>      | <b>I</b>      | <b>J</b>                                                                                                                                                                                                                                                                                                                                                                                                                                                                                                                                                                                                                                                                                                                                                                                                                                                                                                                                                                                                                                                                                                                                 | <b>K</b>      |         |                                                                                                                                                                                                                                                                                                                                                                                                                                          |  |  |  |  |  |
| <b>Lymphoma</b>                                                                                                                                                                                              | <b>101</b>                                                                                                                                                                                                                                                                                          |                 |                  | 5.0 ( 3 – 9 )                                                                                                                                                    | 9.0 ( 4 – 9 ) | 7.0 ( 6 – 9 ) |                                                                                                                                                                                         |               |               |                                                                                                                                                                                                                                                                                                                                                                                                                                                                                                                                                                                                                                                                                                                                                                                                                                                                                                                                                                                                                                                                                                                                          |               |         |                                                                                                                                                                                                                                                                                                                                                                                                                                          |  |  |  |  |  |
| Stage I                                                                                                                                                                                                      | <b>102</b>                                                                                                                                                                                                                                                                                          | 9.0 ( 7 – 9 )   | 8.0 ( 5 – 9 )    | 8.0 ( 7 – 9 )                                                                                                                                                    |               |               | 4.0 ( 2 – 7 )                                                                                                                                                                           | 4.5 ( 2 – 8 ) | 4.0 ( 1 – 9 ) | 5.0 ( 2 – 9 )                                                                                                                                                                                                                                                                                                                                                                                                                                                                                                                                                                                                                                                                                                                                                                                                                                                                                                                                                                                                                                                                                                                            | 7.0 ( 3 – 9 ) |         |                                                                                                                                                                                                                                                                                                                                                                                                                                          |  |  |  |  |  |
| Stage II                                                                                                                                                                                                     | <b>103</b>                                                                                                                                                                                                                                                                                          | 8.0 ( 6 – 9 )   | 7.0 ( 3 – 8 )    | 8.0 ( 5 – 8 )                                                                                                                                                    |               |               | 2.5 ( 1 – 5 )                                                                                                                                                                           | 4.0 ( 2 – 8 ) | 4.0 ( 2 – 9 ) | 4.5 ( 2 – 9 )                                                                                                                                                                                                                                                                                                                                                                                                                                                                                                                                                                                                                                                                                                                                                                                                                                                                                                                                                                                                                                                                                                                            | 6.0 ( 3 – 9 ) |         |                                                                                                                                                                                                                                                                                                                                                                                                                                          |  |  |  |  |  |
| Stage III                                                                                                                                                                                                    | <b>104</b>                                                                                                                                                                                                                                                                                          | 7.0 ( 3 – 9 )   | 5.5 ( 1 – 7 )    | 6.0 ( 2 – 8 )                                                                                                                                                    |               |               | 2.0 ( 1 – 3 )                                                                                                                                                                           | 3.0 ( 1 – 7 ) | 3.0 ( 1 – 8 ) | 3.5 ( 1 – 8 )                                                                                                                                                                                                                                                                                                                                                                                                                                                                                                                                                                                                                                                                                                                                                                                                                                                                                                                                                                                                                                                                                                                            | 5.0 ( 3 – 9 ) |         |                                                                                                                                                                                                                                                                                                                                                                                                                                          |  |  |  |  |  |
| Stage IV                                                                                                                                                                                                     | <b>105</b>                                                                                                                                                                                                                                                                                          | 6.0 ( 2 – 9 )   | 4.5 ( 1 – 6 )    | 5.0 ( 1 – 6 )                                                                                                                                                    |               |               |                                                                                                                                                                                         |               |               |                                                                                                                                                                                                                                                                                                                                                                                                                                                                                                                                                                                                                                                                                                                                                                                                                                                                                                                                                                                                                                                                                                                                          |               |         |                                                                                                                                                                                                                                                                                                                                                                                                                                          |  |  |  |  |  |

[10] Curability is the extent to which a patient diagnosed with cancer is more likely to die of something else. If a cancer is completely curable, no one will die of cancer.

[11] Includes active treatment or surveillance.

[12] For example, to answer 2G, consider the time from the beginning of stage I to the beginning of stage II. For 3G, consider the time from the beginning of stage II to the beginning of stage III. Similarly, for 4G, consider the time from the beginning of stage III to the beginning of stage IV.

[13] For stage I, assume all stage I-IV cancers are detected during stage I. For stage II, assume that all stage III and IV cancers are detected by stage II; any cancers that had been detected in stage I or II would still be detected during those stages. For the stage III, assume all stage IV cancers were diagnosed during stage III; any cancers that had been detected in stages I-III would still be detected during those stages.

[14] If there are many treatment advancements, cure rates may increase, and if treatment remains unchanged, cure rates are unlikely to change.

[15] A patient who is not cured could have increased life expectancy (e.g. still die of this cancer).

[16] Treatment consistent with NCCN guidelines.

[17] Please refer to the table above for examples of lower risk cancers.

[18] Please refer to the table above for examples of higher risk cancers.

TABLE 3. OTHER HEMATOLOGIC CANCERS

|                                                                                                                                                                                                   |                                                                                                                                         |                                                                                                                                                           |                                                                                                                                                                                                                                                                                                                                                                            |                  |               |               |                                                                                                                                              |                                                                                                                           |                                                                    |                                                                                |                                                                                                                                                                                                                                                                                                                                                                          |                                                                                                                                                                                                                                                                                                                                                                                                                       |         |         |         |         |         |
|---------------------------------------------------------------------------------------------------------------------------------------------------------------------------------------------------|-----------------------------------------------------------------------------------------------------------------------------------------|-----------------------------------------------------------------------------------------------------------------------------------------------------------|----------------------------------------------------------------------------------------------------------------------------------------------------------------------------------------------------------------------------------------------------------------------------------------------------------------------------------------------------------------------------|------------------|---------------|---------------|----------------------------------------------------------------------------------------------------------------------------------------------|---------------------------------------------------------------------------------------------------------------------------|--------------------------------------------------------------------|--------------------------------------------------------------------------------|--------------------------------------------------------------------------------------------------------------------------------------------------------------------------------------------------------------------------------------------------------------------------------------------------------------------------------------------------------------------------|-----------------------------------------------------------------------------------------------------------------------------------------------------------------------------------------------------------------------------------------------------------------------------------------------------------------------------------------------------------------------------------------------------------------------|---------|---------|---------|---------|---------|
| <p>Please enter a rating in each yellow cell, where each cell represents a cancer type.</p> <p>If there is heterogeneity within a category, do your best to imagine a <b>typical</b> patient.</p> | <p>Q1: What is the likelihood that patients diagnosed with this cancer today will be cured [19] with <b>typical treatment</b> [20]?</p> | <p>Q2: What is the likelihood that <b>untreated patients</b> early [21] in their disease course with this cancer will progress and require treatment?</p> | <p>Imagine an annual hypothetical screening blood test for patients ≥50 years of age that is 100% sensitive and 100% specific for the cancer you are being asked to rate. Assume this test cannot differentiate between higher and lower risk cancers.</p> <p>If all cancers of this type were diagnosed earlier [21] in their disease course, to what extent would...</p> |                  |               |               | <p>Q3: ...<b>life expectancy</b> increase in all patients with this cancer, relative to life expectancy without the screening test [23]?</p> | <p>...<b>cure rates</b> increase in all patients with this cancer, relative to cure rates without the screening test?</p> | <p>Q4: Assume patients are receiving <b>typical treatment</b>.</p> | <p>Q5: Assume patients are receiving <b>best available treatment</b> [24].</p> | <p>Now consider what medical practice might be like in 2030 [22] with cure rates higher than today's.</p> <p>Q6: If all cancers of this type were diagnosed earlier in their disease course, to what extent would <b>cure rates</b> increase with <b>typical treatment</b> in all patients with this cancer, relative to 2030 cure rates without the screening test?</p> |                                                                                                                                                                                                                                                                                                                                                                                                                       |         |         |         |         |         |
|                                                                                                                                                                                                   |                                                                                                                                         |                                                                                                                                                           | <p>For columns <b>A</b> through <b>F</b>, enter a rating of 1 through 9, where:</p> <p>1 =Extremely unlikely<br/>           3 =Somewhat unlikely<br/>           5 =Neutral, neither likely nor unlikely<br/>           7 =Somewhat likely<br/>           9 =Extremely likely</p>                                                                                           |                  |               |               |                                                                                                                                              |                                                                                                                           |                                                                    |                                                                                |                                                                                                                                                                                                                                                                                                                                                                          | <p>For columns <b>G</b> through <b>J</b>, enter a rating of 1 through 9, where your answer reflects your judgement about how much the outcome of interest (e.g., life expectancy in Q3 and cure rates in Q4, Q5, Q6) would increase:</p> <p>1 =Not at all<br/>           3 =Slightly<br/>           5 =Moderately<br/>           7 =Considerably<br/>           9 =A great deal, doubling the outcome of interest</p> |         |         |         |         |         |
|                                                                                                                                                                                                   |                                                                                                                                         |                                                                                                                                                           | Lower risk [25]                                                                                                                                                                                                                                                                                                                                                            | Higher risk [26] | Overall       | Lower risk    |                                                                                                                                              |                                                                                                                           |                                                                    |                                                                                |                                                                                                                                                                                                                                                                                                                                                                          | Higher risk                                                                                                                                                                                                                                                                                                                                                                                                           | Overall | Overall | Overall | Overall | Overall |
| <b>A</b>                                                                                                                                                                                          | <b>B</b>                                                                                                                                | <b>C</b>                                                                                                                                                  | <b>D</b>                                                                                                                                                                                                                                                                                                                                                                   | <b>E</b>         | <b>F</b>      | <b>G</b>      | <b>H</b>                                                                                                                                     | <b>I</b>                                                                                                                  | <b>J</b>                                                           |                                                                                |                                                                                                                                                                                                                                                                                                                                                                          |                                                                                                                                                                                                                                                                                                                                                                                                                       |         |         |         |         |         |
| ALL [27]                                                                                                                                                                                          | 106                                                                                                                                     |                                                                                                                                                           |                                                                                                                                                                                                                                                                                                                                                                            |                  |               |               |                                                                                                                                              |                                                                                                                           |                                                                    |                                                                                |                                                                                                                                                                                                                                                                                                                                                                          |                                                                                                                                                                                                                                                                                                                                                                                                                       |         |         |         |         |         |
| CLL [28]                                                                                                                                                                                          | 107                                                                                                                                     | 5.0 ( 1 – 9 )                                                                                                                                             | 2.5 ( 1 – 7 )                                                                                                                                                                                                                                                                                                                                                              | 4.0 ( 1 – 8 )    | 3.5 ( 1 – 7 ) | 7.0 ( 1 – 9 ) | 5.0 ( 1 – 8 )                                                                                                                                | 3.0 ( 1 – 5 )                                                                                                             | 3.0 ( 1 – 5 )                                                      | 3.0 ( 1 – 6 )                                                                  | 4.5 ( 1 – 7 )                                                                                                                                                                                                                                                                                                                                                            |                                                                                                                                                                                                                                                                                                                                                                                                                       |         |         |         |         |         |
| Lymphoid Leukemia                                                                                                                                                                                 | 108                                                                                                                                     |                                                                                                                                                           |                                                                                                                                                                                                                                                                                                                                                                            |                  |               |               |                                                                                                                                              |                                                                                                                           |                                                                    |                                                                                |                                                                                                                                                                                                                                                                                                                                                                          |                                                                                                                                                                                                                                                                                                                                                                                                                       |         |         |         |         |         |
|                                                                                                                                                                                                   |                                                                                                                                         |                                                                                                                                                           |                                                                                                                                                                                                                                                                                                                                                                            |                  |               |               |                                                                                                                                              |                                                                                                                           |                                                                    |                                                                                |                                                                                                                                                                                                                                                                                                                                                                          |                                                                                                                                                                                                                                                                                                                                                                                                                       |         |         |         |         |         |
|                                                                                                                                                                                                   |                                                                                                                                         |                                                                                                                                                           |                                                                                                                                                                                                                                                                                                                                                                            |                  |               |               |                                                                                                                                              |                                                                                                                           |                                                                    |                                                                                |                                                                                                                                                                                                                                                                                                                                                                          |                                                                                                                                                                                                                                                                                                                                                                                                                       |         |         |         |         |         |
| Plasma Cell Neoplasm (Multiple Myeloma)                                                                                                                                                           | 109                                                                                                                                     | 7.0 ( 4 – 9 )                                                                                                                                             | 2.5 ( 1 – 5 )                                                                                                                                                                                                                                                                                                                                                              | 3.5 ( 2 – 5 )    | 6.0 ( 2 – 7 ) | 8.0 ( 6 – 9 ) | 7.0 ( 6 – 8 )                                                                                                                                | 4.5 ( 3 – 6 )                                                                                                             | 3.5 ( 2 – 6 )                                                      | 4.5 ( 2 – 6 )                                                                  | 5.0 ( 3 – 7 )                                                                                                                                                                                                                                                                                                                                                            |                                                                                                                                                                                                                                                                                                                                                                                                                       |         |         |         |         |         |
| AML                                                                                                                                                                                               | 110                                                                                                                                     | 6.0 ( 3 – 7 )                                                                                                                                             | 2.5 ( 2 – 4 )                                                                                                                                                                                                                                                                                                                                                              | 3.5 ( 3 – 5 )    | 8.5 ( 7 – 9 ) | 9.0 ( 7 – 9 ) | 9.0 ( 7 – 9 )                                                                                                                                | 4.5 ( 1 – 7 )                                                                                                             | 4.0 ( 1 – 7 )                                                      | 5.0 ( 1 – 7 )                                                                  | 5.0 ( 1 – 8 )                                                                                                                                                                                                                                                                                                                                                            |                                                                                                                                                                                                                                                                                                                                                                                                                       |         |         |         |         |         |
| CML                                                                                                                                                                                               | 111                                                                                                                                     |                                                                                                                                                           |                                                                                                                                                                                                                                                                                                                                                                            |                  |               |               |                                                                                                                                              |                                                                                                                           |                                                                    |                                                                                |                                                                                                                                                                                                                                                                                                                                                                          |                                                                                                                                                                                                                                                                                                                                                                                                                       |         |         |         |         |         |
|                                                                                                                                                                                                   |                                                                                                                                         |                                                                                                                                                           |                                                                                                                                                                                                                                                                                                                                                                            |                  |               |               |                                                                                                                                              |                                                                                                                           |                                                                    |                                                                                |                                                                                                                                                                                                                                                                                                                                                                          |                                                                                                                                                                                                                                                                                                                                                                                                                       |         |         |         |         |         |
| Myeloid Neoplasm                                                                                                                                                                                  | 112                                                                                                                                     |                                                                                                                                                           |                                                                                                                                                                                                                                                                                                                                                                            |                  |               |               |                                                                                                                                              |                                                                                                                           |                                                                    |                                                                                |                                                                                                                                                                                                                                                                                                                                                                          |                                                                                                                                                                                                                                                                                                                                                                                                                       |         |         |         |         |         |
|                                                                                                                                                                                                   |                                                                                                                                         |                                                                                                                                                           |                                                                                                                                                                                                                                                                                                                                                                            |                  |               |               |                                                                                                                                              |                                                                                                                           |                                                                    |                                                                                |                                                                                                                                                                                                                                                                                                                                                                          |                                                                                                                                                                                                                                                                                                                                                                                                                       |         |         |         |         |         |

[19] Curability is the extent to which a patient diagnosed with cancer is more likely to die of something else. If a cancer is completely curable, no one will die of cancer.

[20] Includes active treatment or surveillance.

[21] We define "early" as asymptomatic but already meeting the definition of cancer (e.g., not having a precursor condition).

[22] If there are many treatment advancements, cure rates may increase, and if treatment remains unchanged, cure rates are unlikely to change.

[23] A patient who is not cured could have increased life expectancy (e.g. still die of this cancer).

[24] Treatment consistent with NCCN guidelines.

[25] Please refer to the table above for examples of lower risk cancers.

[26] Please refer to the table above for examples of higher risk cancers.

[27] Acute lymphocytic (or lymphoblastic) leukemia.

[28] Chronic lymphocytic (or lymphoblastic) leukemia.

[29] Acute myeloid leukemia.

[30] Chronic myeloid leukemia.
