# Supplementary material for: Impact of early detection on cancer curability: A modified Delphi panel study
Source: PubMed Central journal article supplement (PMC9770338; doi:10.1371/journal.pone.0279227), 2022-12-21
Supplement: pone.0279227.s003.pdf [file pone.0279227.s003.pdf]

All Panelists

The following document presents the group's median and range of ratings. Each cell is color coded. Cells in yellow are ones where the group disagreed (≥2 panelists gave that cell a rating of 1-3 and ≥2 panelists gave that cell a rating of 7-9); cells in blue are ones where the group agreed, with the darker blues representing higher medians, as shown in the key on the right.

| Median                                                         | (Range) |
|----------------------------------------------------------------|---------|
| Yellow: Disagreement (≥2 ratings of 1-3 and ≥2 ratings of 7-9) |         |
| Blue 1: Median ≥7-9 without disagreement                       |         |
| Blue 2: Median ≥4-<7, without disagreement                     |         |
| Blue 3: Median 1-<4 without disagreement                       |         |

SECTION 1

TABLE 1. SOLID ORGAN CANCERS

| Please enter a rating in each yellow cell, where each cell represents a cancer or cancer stage.<br><br>If there is heterogeneity within a category, do your best to imagine a typical patient. |           | Q1: What is the likelihood that adults diagnosed with this cancer at this stage today will be cured [1] with <b>typical treatment</b> [2]? |                 |               | Q2: What is the likelihood that <b>untreated adults</b> with stage I or II of this cancer will progress to stage III or IV disease over their lifetime? |               |               | Q3: How long does it take this cancer to progress from the beginning of this stage [3] to the beginning of the next stage in undiagnosed adults (natural history of disease)? |               |               | Imagine an annual hypothetical screening blood test for patients ≥50 years of age that is 100% sensitive and 100% specific for the stage of cancer you are being asked to rate. Assume this test cannot differentiate between higher and lower risk cancers.<br><br>If all cancers of this type were diagnosed no later than the stage [4] indicated by the row heading, to what extent would...<br><br>Q4: ... <b>life expectancy</b> increase in <b>all patients</b> with this cancer, relative to life expectancy without the screening test [6]?<br><br>Assume patients are receiving <b>typical treatment</b> . |               |         | ... <b>cure rates</b> increase in <b>all patients</b> with this cancer, relative to cure rates without the screening test?<br><br>Q5: Assume patients are receiving <b>typical treatment</b> . |         |         | Q6: Assume patients are receiving <b>best available treatment</b> [7]. |         |         | Now consider what medical practice might be like in 2030 [5] with cure rates higher than today's.<br><br>Q7: If all cancers of this type were diagnosed no later than this stage, to what extent would <b>cure rates</b> increase with <b>typical treatment</b> in <b>all patients</b> with this cancer, relative to 2030 cure rates without the screening test? |  |  |
|------------------------------------------------------------------------------------------------------------------------------------------------------------------------------------------------|-----------|--------------------------------------------------------------------------------------------------------------------------------------------|-----------------|---------------|---------------------------------------------------------------------------------------------------------------------------------------------------------|---------------|---------------|-------------------------------------------------------------------------------------------------------------------------------------------------------------------------------|---------------|---------------|----------------------------------------------------------------------------------------------------------------------------------------------------------------------------------------------------------------------------------------------------------------------------------------------------------------------------------------------------------------------------------------------------------------------------------------------------------------------------------------------------------------------------------------------------------------------------------------------------------------------|---------------|---------|------------------------------------------------------------------------------------------------------------------------------------------------------------------------------------------------|---------|---------|------------------------------------------------------------------------|---------|---------|------------------------------------------------------------------------------------------------------------------------------------------------------------------------------------------------------------------------------------------------------------------------------------------------------------------------------------------------------------------|--|--|
|                                                                                                                                                                                                |           | Lower risk [8]                                                                                                                             | Higher risk [9] | Overall       | Lower risk                                                                                                                                              | Higher risk   | Overall       | Overall                                                                                                                                                                       | Overall       | Overall       | Overall                                                                                                                                                                                                                                                                                                                                                                                                                                                                                                                                                                                                              | Overall       | Overall | Overall                                                                                                                                                                                        | Overall | Overall | Overall                                                                | Overall | Overall |                                                                                                                                                                                                                                                                                                                                                                  |  |  |
|                                                                                                                                                                                                |           | A                                                                                                                                          | B               | C             | D                                                                                                                                                       | E             | F             | G                                                                                                                                                                             | H             | I             | J                                                                                                                                                                                                                                                                                                                                                                                                                                                                                                                                                                                                                    | K             |         |                                                                                                                                                                                                |         |         |                                                                        |         |         |                                                                                                                                                                                                                                                                                                                                                                  |  |  |
| <b>Prostate</b>                                                                                                                                                                                |           | 1                                                                                                                                          |                 |               | 3.5 ( 1 - 5 )                                                                                                                                           | 7.0 ( 5 - 9 ) | 6.0 ( 3 - 7 ) |                                                                                                                                                                               |               |               |                                                                                                                                                                                                                                                                                                                                                                                                                                                                                                                                                                                                                      |               |         |                                                                                                                                                                                                |         |         |                                                                        |         |         |                                                                                                                                                                                                                                                                                                                                                                  |  |  |
|                                                                                                                                                                                                | Stage I   | 2                                                                                                                                          | 9.0 ( 9 - 9 )   | 8.0 ( 5 - 9 ) | 8.5 ( 7 - 9 )                                                                                                                                           |               |               | 7.0 ( 5 - 8 )                                                                                                                                                                 | 3.5 ( 1 - 6 ) | 3.0 ( 1 - 5 ) | 3.5 ( 1 - 5 )                                                                                                                                                                                                                                                                                                                                                                                                                                                                                                                                                                                                        | 3.0 ( 1 - 7 ) |         |                                                                                                                                                                                                |         |         |                                                                        |         |         |                                                                                                                                                                                                                                                                                                                                                                  |  |  |
|                                                                                                                                                                                                | Stage II  | 3                                                                                                                                          | 9.0 ( 8 - 9 )   | 7.0 ( 5 - 9 ) | 8.0 ( 7 - 9 )                                                                                                                                           |               |               | 5.0 ( 4 - 6 )                                                                                                                                                                 | 4.0 ( 2 - 5 ) | 3.0 ( 2 - 5 ) | 3.0 ( 2 - 5 )                                                                                                                                                                                                                                                                                                                                                                                                                                                                                                                                                                                                        | 4.5 ( 3 - 5 ) |         |                                                                                                                                                                                                |         |         |                                                                        |         |         |                                                                                                                                                                                                                                                                                                                                                                  |  |  |
|                                                                                                                                                                                                | Stage III | 4                                                                                                                                          | 7.0 ( 5 - 9 )   | 4.0 ( 3 - 6 ) | 5.5 ( 4 - 8 )                                                                                                                                           |               |               | 3.0 ( 2 - 5 )                                                                                                                                                                 | 3.0 ( 2 - 5 ) | 2.0 ( 1 - 5 ) | 3.0 ( 2 - 5 )                                                                                                                                                                                                                                                                                                                                                                                                                                                                                                                                                                                                        | 4.0 ( 3 - 6 ) |         |                                                                                                                                                                                                |         |         |                                                                        |         |         |                                                                                                                                                                                                                                                                                                                                                                  |  |  |
|                                                                                                                                                                                                | Stage IV  | 5                                                                                                                                          | 1.5 ( 1 - 7 )   | 1.0 ( 1 - 4 ) | 1.0 ( 1 - 5 )                                                                                                                                           |               |               |                                                                                                                                                                               |               |               |                                                                                                                                                                                                                                                                                                                                                                                                                                                                                                                                                                                                                      |               |         |                                                                                                                                                                                                |         |         |                                                                        |         |         |                                                                                                                                                                                                                                                                                                                                                                  |  |  |
| <b>Breast</b>                                                                                                                                                                                  |           | 6                                                                                                                                          |                 |               | 6.0 ( 5 - 7 )                                                                                                                                           | 8.0 ( 5 - 9 ) | 7.0 ( 7 - 8 ) |                                                                                                                                                                               |               |               |                                                                                                                                                                                                                                                                                                                                                                                                                                                                                                                                                                                                                      |               |         |                                                                                                                                                                                                |         |         |                                                                        |         |         |                                                                                                                                                                                                                                                                                                                                                                  |  |  |
|                                                                                                                                                                                                | Stage I   | 7                                                                                                                                          | 9.0 ( 8 - 9 )   | 8.0 ( 6 - 9 ) | 9.0 ( 7 - 9 )                                                                                                                                           |               |               | 3.0 ( 2 - 4 )                                                                                                                                                                 | 7.0 ( 6 - 8 ) | 6.0 ( 3 - 8 ) | 6.5 ( 4 - 8 )                                                                                                                                                                                                                                                                                                                                                                                                                                                                                                                                                                                                        | 7.5 ( 3 - 9 ) |         |                                                                                                                                                                                                |         |         |                                                                        |         |         |                                                                                                                                                                                                                                                                                                                                                                  |  |  |
|                                                                                                                                                                                                | Stage II  | 8                                                                                                                                          | 8.0 ( 8 - 9 )   | 6.5 ( 4 - 8 ) | 7.5 ( 6 - 8 )                                                                                                                                           |               |               | 2.0 ( 1 - 3 )                                                                                                                                                                 | 5.0 ( 4 - 6 ) | 5.5 ( 2 - 7 ) | 5.5 ( 3 - 7 )                                                                                                                                                                                                                                                                                                                                                                                                                                                                                                                                                                                                        | 6.0 ( 4 - 7 ) |         |                                                                                                                                                                                                |         |         |                                                                        |         |         |                                                                                                                                                                                                                                                                                                                                                                  |  |  |
|                                                                                                                                                                                                | Stage III | 9                                                                                                                                          | 6.5 ( 4 - 7 )   | 4.0 ( 3 - 5 ) | 5.5 ( 4 - 6 )                                                                                                                                           |               |               | 1.5 ( 1 - 2 )                                                                                                                                                                 | 3.0 ( 2 - 5 ) | 3.0 ( 2 - 6 ) | 3.0 ( 2 - 6 )                                                                                                                                                                                                                                                                                                                                                                                                                                                                                                                                                                                                        | 5.0 ( 3 - 7 ) |         |                                                                                                                                                                                                |         |         |                                                                        |         |         |                                                                                                                                                                                                                                                                                                                                                                  |  |  |
|                                                                                                                                                                                                | Stage IV  | 10                                                                                                                                         | 1.5 ( 1 - 3 )   | 1.0 ( 1 - 4 ) | 1.0 ( 1 - 2 )                                                                                                                                           |               |               |                                                                                                                                                                               |               |               |                                                                                                                                                                                                                                                                                                                                                                                                                                                                                                                                                                                                                      |               |         |                                                                                                                                                                                                |         |         |                                                                        |         |         |                                                                                                                                                                                                                                                                                                                                                                  |  |  |
| <b>Lung</b>                                                                                                                                                                                    |           | 11                                                                                                                                         |                 |               | 7.0 ( 4 - 9 )                                                                                                                                           | 9.0 ( 8 - 9 ) | 8.0 ( 7 - 9 ) |                                                                                                                                                                               |               |               |                                                                                                                                                                                                                                                                                                                                                                                                                                                                                                                                                                                                                      |               |         |                                                                                                                                                                                                |         |         |                                                                        |         |         |                                                                                                                                                                                                                                                                                                                                                                  |  |  |
|                                                                                                                                                                                                | Stage I   | 12                                                                                                                                         | 7.5 ( 7 - 9 )   | 6.0 ( 4 - 7 ) | 7.0 ( 6 - 9 )                                                                                                                                           |               |               | 2.0 ( 2 - 3 )                                                                                                                                                                 | 8.0 ( 7 - 9 ) | 8.0 ( 6 - 9 ) | 8.0 ( 6 - 9 )                                                                                                                                                                                                                                                                                                                                                                                                                                                                                                                                                                                                        | 8.0 ( 3 - 9 ) |         |                                                                                                                                                                                                |         |         |                                                                        |         |         |                                                                                                                                                                                                                                                                                                                                                                  |  |  |
|                                                                                                                                                                                                | Stage II  | 13                                                                                                                                         | 5.0 ( 4 - 7 )   | 4.5 ( 3 - 6 ) | 5.0 ( 3 - 8 )                                                                                                                                           |               |               | 1.0 ( 1 - 2 )                                                                                                                                                                 | 6.0 ( 5 - 7 ) | 6.0 ( 4 - 6 ) | 7.0 ( 5 - 7 )                                                                                                                                                                                                                                                                                                                                                                                                                                                                                                                                                                                                        | 7.0 ( 4 - 8 ) |         |                                                                                                                                                                                                |         |         |                                                                        |         |         |                                                                                                                                                                                                                                                                                                                                                                  |  |  |
|                                                                                                                                                                                                | Stage III | 14                                                                                                                                         | 3.0 ( 1 - 5 )   | 2.5 ( 1 - 4 ) | 3.0 ( 1 - 5 )                                                                                                                                           |               |               | 1.0 ( 1 - 1 )                                                                                                                                                                 | 3.5 ( 3 - 5 ) | 3.0 ( 2 - 5 ) | 4.0 ( 2 - 6 )                                                                                                                                                                                                                                                                                                                                                                                                                                                                                                                                                                                                        | 5.0 ( 3 - 6 ) |         |                                                                                                                                                                                                |         |         |                                                                        |         |         |                                                                                                                                                                                                                                                                                                                                                                  |  |  |
|                                                                                                                                                                                                | Stage IV  | 15                                                                                                                                         | 1.0 ( 1 - 2 )   | 1.0 ( 1 - 1 ) | 1.0 ( 1 - 2 )                                                                                                                                           |               |               |                                                                                                                                                                               |               |               |                                                                                                                                                                                                                                                                                                                                                                                                                                                                                                                                                                                                                      |               |         |                                                                                                                                                                                                |         |         |                                                                        |         |         |                                                                                                                                                                                                                                                                                                                                                                  |  |  |

[1] Curability is the receipt of effective treatment such that a population of individuals who are "cured" would have the same life expectancy as a population that never had the cancer being considered. Some members of each of those populations (cured and never had cancer) might be expected to die prematurely (e.g., from trauma), but many more would be expected to die of more typical age-related causes.

[2] Includes active treatment or surveillance.

[3] For example, to answer 2G, consider the time from the beginning of stage I to the beginning of stage II. For 3G, consider the time from the beginning of stage II to the beginning of stage III. Similarly, for 4G, consider the time from the beginning of stage III to the beginning of stage IV.

[4] For stage I, assume all stage II-IV cancers are detected during stage I. For stage II, assume that all stage III and IV cancers are detected by stage II; any cancers that had been detected in stage I or II would still be detected during those stages. For the stage III, assume all stage IV cancers were diagnosed during stage III; any cancers that had been detected in stages I-III would still be detected during those stages.

[5] If there are many treatment advancements, cure rates may increase, and if treatment remains unchanged, cure rates are unlikely to change.

[6] A patient who is not cured could have increased life expectancy (e.g. still die of this cancer).

[7] Treatment consistent with NCCN guidelines.

[8] Please refer to the table above for examples of lower risk cancers.

[9] Please refer to the table above for examples of higher risk cancers.

| Please enter a rating in each yellow cell, where each cell represents a cancer or cancer stage.<br><br>If there is heterogeneity within a category, do your best to imagine a <b>typical</b> patient. |           | Q1: What is the likelihood that adults diagnosed with this cancer at this stage today will be cured [1] with <b>typical treatment</b> [2]?                                                                        |                 |               | Q2: What is the likelihood that <b>untreated adults</b> with stage I or II of this cancer will progress to stage III or IV disease over their lifetime? |               |               | Q3: How long does it take this cancer to progress from the beginning of this stage [3] to the beginning of the next stage in undiagnosed adults (natural history of disease)? |               |               | Q4: ... <b>life expectancy</b> increase in <b>all</b> patients with this cancer, relative to life expectancy without the screening test [6]? |               |         | Q5: Assume patients are receiving <b>typical treatment</b> ... <b>cure rates</b> increase in <b>all</b> patients with this cancer, relative to cure rates without the screening test?                                                                                                                                                                  |         |         | Q6: Assume patients are receiving <b>typical treatment</b>   Q6: Assume patients are receiving <b>best available treatment</b> [7]. |         |         | Q7: If all cancers of this type were diagnosed no later than this stage, to what extent would <b>cure rates</b> increase with <b>typical treatment</b> in <b>all</b> patients with this cancer, relative to 2030 cure rates without the screening test? |  |  |
|-------------------------------------------------------------------------------------------------------------------------------------------------------------------------------------------------------|-----------|-------------------------------------------------------------------------------------------------------------------------------------------------------------------------------------------------------------------|-----------------|---------------|---------------------------------------------------------------------------------------------------------------------------------------------------------|---------------|---------------|-------------------------------------------------------------------------------------------------------------------------------------------------------------------------------|---------------|---------------|----------------------------------------------------------------------------------------------------------------------------------------------|---------------|---------|--------------------------------------------------------------------------------------------------------------------------------------------------------------------------------------------------------------------------------------------------------------------------------------------------------------------------------------------------------|---------|---------|-------------------------------------------------------------------------------------------------------------------------------------|---------|---------|---------------------------------------------------------------------------------------------------------------------------------------------------------------------------------------------------------------------------------------------------------|--|--|
|                                                                                                                                                                                                       |           | For columns <b>A</b> through <b>F</b> , enter a rating of 1 through 9, where:<br>1=Extremely unlikely<br>3=Somewhat unlikely<br>5=Neutral, neither likely nor unlikely<br>7=Somewhat likely<br>9=Extremely likely |                 |               |                                                                                                                                                         |               |               | For column <b>G</b> , enter a rating of 1 through 9, where:<br>1=Less than 1 year<br>3=Slightly<br>5=5 years<br>9=9 or more years                                             |               |               |                                                                                                                                              |               |         | For columns <b>H</b> through <b>K</b> , enter a rating of 1 through 9, where your answer reflects your judgement about how much the outcome of interest (e.g., life expectancy in Q4 and cure rates in Q5, Q6, Q7) would increase:<br>1=Not at all<br>3=Slightly<br>5=Moderately<br>7=Considerably<br>9=A great deal, doubling the outcome of interest |         |         |                                                                                                                                     |         |         |                                                                                                                                                                                                                                                         |  |  |
|                                                                                                                                                                                                       |           | Lower risk [8]                                                                                                                                                                                                    | Higher risk [9] | Overall       | Lower risk                                                                                                                                              | Higher risk   | Overall       | Overall                                                                                                                                                                       | Overall       | Overall       | Overall                                                                                                                                      | Overall       | Overall | Overall                                                                                                                                                                                                                                                                                                                                                | Overall | Overall | Overall                                                                                                                             | Overall | Overall | Overall                                                                                                                                                                                                                                                 |  |  |
| <b>A</b>                                                                                                                                                                                              | <b>B</b>  | <b>C</b>                                                                                                                                                                                                          | <b>D</b>        | <b>E</b>      | <b>F</b>                                                                                                                                                | <b>G</b>      | <b>H</b>      | <b>I</b>                                                                                                                                                                      | <b>J</b>      | <b>K</b>      |                                                                                                                                              |               |         |                                                                                                                                                                                                                                                                                                                                                        |         |         |                                                                                                                                     |         |         |                                                                                                                                                                                                                                                         |  |  |
| <b>Colon/Rectum</b>                                                                                                                                                                                   | <b>16</b> |                                                                                                                                                                                                                   |                 |               |                                                                                                                                                         |               |               |                                                                                                                                                                               |               |               |                                                                                                                                              |               |         |                                                                                                                                                                                                                                                                                                                                                        |         |         |                                                                                                                                     |         |         |                                                                                                                                                                                                                                                         |  |  |
| Stage I                                                                                                                                                                                               | <b>17</b> | 9.0 ( 8 - 9 )                                                                                                                                                                                                     | 9.0 ( 8 - 9 )   | 9.0 ( 8 - 9 ) | 7.0 ( 6 - 8 )                                                                                                                                           | 8.0 ( 8 - 9 ) | 8.0 ( 7 - 9 ) | 3.5 ( 2 - 5 )                                                                                                                                                                 | 7.0 ( 6 - 9 ) | 7.0 ( 6 - 9 ) | 7.5 ( 6 - 9 )                                                                                                                                | 8.0 ( 3 - 9 ) |         |                                                                                                                                                                                                                                                                                                                                                        |         |         |                                                                                                                                     |         |         |                                                                                                                                                                                                                                                         |  |  |
| Stage II                                                                                                                                                                                              | <b>18</b> | 8.0 ( 7 - 9 )                                                                                                                                                                                                     | 7.0 ( 7 - 8 )   | 8.0 ( 7 - 8 ) |                                                                                                                                                         |               |               | 3.0 ( 2 - 5 )                                                                                                                                                                 | 6.0 ( 5 - 8 ) | 6.0 ( 5 - 7 ) | 6.0 ( 5 - 7 )                                                                                                                                | 7.0 ( 4 - 8 ) |         |                                                                                                                                                                                                                                                                                                                                                        |         |         |                                                                                                                                     |         |         |                                                                                                                                                                                                                                                         |  |  |
| Stage III                                                                                                                                                                                             | <b>19</b> | 6.0 ( 4 - 8 )                                                                                                                                                                                                     | 5.0 ( 3 - 6 )   | 5.0 ( 3 - 6 ) |                                                                                                                                                         |               |               | 1.0 ( 1 - 2 )                                                                                                                                                                 | 5.0 ( 1 - 6 ) | 4.0 ( 3 - 5 ) | 5.0 ( 3 - 6 )                                                                                                                                | 6.0 ( 4 - 7 ) |         |                                                                                                                                                                                                                                                                                                                                                        |         |         |                                                                                                                                     |         |         |                                                                                                                                                                                                                                                         |  |  |
| Stage IV                                                                                                                                                                                              | <b>20</b> | 1.5 ( 1 - 4 )                                                                                                                                                                                                     | 1.0 ( 1 - 2 )   | 1.5 ( 1 - 3 ) |                                                                                                                                                         |               |               |                                                                                                                                                                               |               |               |                                                                                                                                              |               |         |                                                                                                                                                                                                                                                                                                                                                        |         |         |                                                                                                                                     |         |         |                                                                                                                                                                                                                                                         |  |  |
| <b>Melanoma</b>                                                                                                                                                                                       | <b>21</b> |                                                                                                                                                                                                                   |                 |               | 6.5 ( 4 - 8 )                                                                                                                                           | 8.0 ( 6 - 9 ) | 7.0 ( 6 - 9 ) |                                                                                                                                                                               |               |               |                                                                                                                                              |               |         |                                                                                                                                                                                                                                                                                                                                                        |         |         |                                                                                                                                     |         |         |                                                                                                                                                                                                                                                         |  |  |
| Stage I                                                                                                                                                                                               | <b>22</b> | 9.0 ( 8 - 9 )                                                                                                                                                                                                     | 9.0 ( 7 - 9 )   | 9.0 ( 8 - 9 ) |                                                                                                                                                         |               |               | 3.0 ( 1 - 5 )                                                                                                                                                                 | 7.0 ( 3 - 8 ) | 7.0 ( 6 - 8 ) | 7.0 ( 6 - 9 )                                                                                                                                | 7.0 ( 3 - 8 ) |         |                                                                                                                                                                                                                                                                                                                                                        |         |         |                                                                                                                                     |         |         |                                                                                                                                                                                                                                                         |  |  |
| Stage II                                                                                                                                                                                              | <b>23</b> | 8.0 ( 7 - 8 )                                                                                                                                                                                                     | 7.0 ( 6 - 8 )   | 7.0 ( 6 - 8 ) |                                                                                                                                                         |               |               | 2.0 ( 1 - 4 )                                                                                                                                                                 | 5.0 ( 2 - 6 ) | 5.0 ( 5 - 6 ) | 5.0 ( 5 - 8 )                                                                                                                                | 6.0 ( 5 - 7 ) |         |                                                                                                                                                                                                                                                                                                                                                        |         |         |                                                                                                                                     |         |         |                                                                                                                                                                                                                                                         |  |  |
| Stage III                                                                                                                                                                                             | <b>24</b> | 5.0 ( 3 - 6 )                                                                                                                                                                                                     | 3.5 ( 2 - 6 )   | 4.0 ( 3 - 6 ) |                                                                                                                                                         |               |               | 1.0 ( 1 - 2 )                                                                                                                                                                 | 3.0 ( 1 - 5 ) | 3.0 ( 2 - 5 ) | 4.0 ( 3 - 5 )                                                                                                                                | 6.0 ( 3 - 7 ) |         |                                                                                                                                                                                                                                                                                                                                                        |         |         |                                                                                                                                     |         |         |                                                                                                                                                                                                                                                         |  |  |
| Stage IV                                                                                                                                                                                              | <b>25</b> | 2.0 ( 1 - 3 )                                                                                                                                                                                                     | 1.0 ( 1 - 2 )   | 1.5 ( 1 - 8 ) |                                                                                                                                                         |               |               |                                                                                                                                                                               |               |               |                                                                                                                                              |               |         |                                                                                                                                                                                                                                                                                                                                                        |         |         |                                                                                                                                     |         |         |                                                                                                                                                                                                                                                         |  |  |
| <b>Kidney</b>                                                                                                                                                                                         | <b>26</b> |                                                                                                                                                                                                                   |                 |               | 5.5 ( 4 - 8 )                                                                                                                                           | 8.0 ( 7 - 9 ) | 7.0 ( 6 - 8 ) |                                                                                                                                                                               |               |               |                                                                                                                                              |               |         |                                                                                                                                                                                                                                                                                                                                                        |         |         |                                                                                                                                     |         |         |                                                                                                                                                                                                                                                         |  |  |
| Stage I                                                                                                                                                                                               | <b>27</b> | 9.0 ( 8 - 9 )                                                                                                                                                                                                     | 9.0 ( 4 - 9 )   | 9.0 ( 7 - 9 ) |                                                                                                                                                         |               |               | 5.0 ( 1 - 7 )                                                                                                                                                                 | 7.0 ( 3 - 8 ) | 7.0 ( 5 - 8 ) | 7.0 ( 5 - 9 )                                                                                                                                | 7.0 ( 3 - 8 ) |         |                                                                                                                                                                                                                                                                                                                                                        |         |         |                                                                                                                                     |         |         |                                                                                                                                                                                                                                                         |  |  |
| Stage II                                                                                                                                                                                              | <b>28</b> | 8.0 ( 7 - 9 )                                                                                                                                                                                                     | 7.0 ( 4 - 8 )   | 8.0 ( 6 - 8 ) |                                                                                                                                                         |               |               | 3.0 ( 1 - 5 )                                                                                                                                                                 | 5.5 ( 4 - 7 ) | 5.5 ( 4 - 6 ) | 6.0 ( 5 - 7 )                                                                                                                                | 6.0 ( 5 - 7 ) |         |                                                                                                                                                                                                                                                                                                                                                        |         |         |                                                                                                                                     |         |         |                                                                                                                                                                                                                                                         |  |  |
| Stage III                                                                                                                                                                                             | <b>29</b> | 6.0 ( 5 - 7 )                                                                                                                                                                                                     | 4.0 ( 3 - 6 )   | 5.0 ( 4 - 6 ) |                                                                                                                                                         |               |               | 2.0 ( 1 - 2 )                                                                                                                                                                 | 4.5 ( 3 - 5 ) | 5.0 ( 3 - 6 ) | 5.0 ( 3 - 6 )                                                                                                                                | 6.0 ( 3 - 7 ) |         |                                                                                                                                                                                                                                                                                                                                                        |         |         |                                                                                                                                     |         |         |                                                                                                                                                                                                                                                         |  |  |
| Stage IV                                                                                                                                                                                              | <b>30</b> | 2.0 ( 1 - 3 )                                                                                                                                                                                                     | 1.0 ( 1 - 2 )   | 2.0 ( 1 - 2 ) |                                                                                                                                                         |               |               |                                                                                                                                                                               |               |               |                                                                                                                                              |               |         |                                                                                                                                                                                                                                                                                                                                                        |         |         |                                                                                                                                     |         |         |                                                                                                                                                                                                                                                         |  |  |
| <b>Head and Neck</b>                                                                                                                                                                                  | <b>31</b> |                                                                                                                                                                                                                   |                 |               | 7.0 ( 5 - 8 )                                                                                                                                           | 8.0 ( 6 - 9 ) | 8.0 ( 6 - 9 ) |                                                                                                                                                                               |               |               |                                                                                                                                              |               |         |                                                                                                                                                                                                                                                                                                                                                        |         |         |                                                                                                                                     |         |         |                                                                                                                                                                                                                                                         |  |  |
| Stage I                                                                                                                                                                                               | <b>32</b> | 8.5 ( 7 - 9 )                                                                                                                                                                                                     | 9.0 ( 7 - 9 )   | 9.0 ( 7 - 9 ) |                                                                                                                                                         |               |               | 3.0 ( 2 - 6 )                                                                                                                                                                 | 7.0 ( 4 - 9 ) | 6.0 ( 4 - 9 ) | 7.0 ( 5 - 8 )                                                                                                                                | 7.0 ( 3 - 8 ) |         |                                                                                                                                                                                                                                                                                                                                                        |         |         |                                                                                                                                     |         |         |                                                                                                                                                                                                                                                         |  |  |
| Stage II                                                                                                                                                                                              | <b>33</b> | 8.0 ( 6 - 9 )                                                                                                                                                                                                     | 7.0 ( 5 - 8 )   | 7.5 ( 6 - 8 ) |                                                                                                                                                         |               |               | 2.0 ( 1 - 4 )                                                                                                                                                                 | 5.0 ( 3 - 7 ) | 5.0 ( 3 - 7 ) | 6.0 ( 4 - 7 )                                                                                                                                | 6.0 ( 4 - 7 ) |         |                                                                                                                                                                                                                                                                                                                                                        |         |         |                                                                                                                                     |         |         |                                                                                                                                                                                                                                                         |  |  |
| Stage III                                                                                                                                                                                             | <b>34</b> | 6.0 ( 3 - 7 )                                                                                                                                                                                                     | 4.5 ( 3 - 6 )   | 5.0 ( 3 - 6 ) |                                                                                                                                                         |               |               | 1.0 ( 1 - 2 )                                                                                                                                                                 | 3.0 ( 2 - 6 ) | 3.0 ( 2 - 6 ) | 4.0 ( 3 - 7 )                                                                                                                                | 5.0 ( 4 - 7 ) |         |                                                                                                                                                                                                                                                                                                                                                        |         |         |                                                                                                                                     |         |         |                                                                                                                                                                                                                                                         |  |  |
| Stage IV                                                                                                                                                                                              | <b>35</b> | 4.0 ( 2 - 6 )                                                                                                                                                                                                     | 2.0 ( 1 - 4 )   | 3.0 ( 1 - 5 ) |                                                                                                                                                         |               |               |                                                                                                                                                                               |               |               |                                                                                                                                              |               |         |                                                                                                                                                                                                                                                                                                                                                        |         |         |                                                                                                                                     |         |         |                                                                                                                                                                                                                                                         |  |  |
| <b>Uterus</b>                                                                                                                                                                                         | <b>36</b> |                                                                                                                                                                                                                   |                 |               | 6.0 ( 3 - 9 )                                                                                                                                           | 8.0 ( 6 - 9 ) | 7.0 ( 5 - 9 ) |                                                                                                                                                                               |               |               |                                                                                                                                              |               |         |                                                                                                                                                                                                                                                                                                                                                        |         |         |                                                                                                                                     |         |         |                                                                                                                                                                                                                                                         |  |  |
| Stage I                                                                                                                                                                                               | <b>37</b> | 9.0 ( 8 - 9 )                                                                                                                                                                                                     | 8.0 ( 7 - 9 )   | 9.0 ( 8 - 9 ) |                                                                                                                                                         |               |               | 4.0 ( 3 - 5 )                                                                                                                                                                 | 6.0 ( 2 - 7 ) | 6.0 ( 2 - 7 ) | 6.0 ( 2 - 8 )                                                                                                                                | 7.0 ( 2 - 8 ) |         |                                                                                                                                                                                                                                                                                                                                                        |         |         |                                                                                                                                     |         |         |                                                                                                                                                                                                                                                         |  |  |
| Stage II                                                                                                                                                                                              | <b>38</b> | 8.0 ( 7 - 9 )                                                                                                                                                                                                     | 6.5 ( 5 - 8 )   | 8.0 ( 7 - 8 ) |                                                                                                                                                         |               |               | 3.0 ( 1 - 5 )                                                                                                                                                                 | 5.0 ( 3 - 6 ) | 5.0 ( 3 - 6 ) | 5.0 ( 4 - 7 )                                                                                                                                | 6.0 ( 4 - 7 ) |         |                                                                                                                                                                                                                                                                                                                                                        |         |         |                                                                                                                                     |         |         |                                                                                                                                                                                                                                                         |  |  |
| Stage III                                                                                                                                                                                             | <b>39</b> | 6.0 ( 5 - 9 )                                                                                                                                                                                                     | 4.5 ( 2 - 5 )   | 5.0 ( 5 - 7 ) |                                                                                                                                                         |               |               | 1.5 ( 1 - 3 )                                                                                                                                                                 | 4.0 ( 3 - 6 ) | 4.0 ( 2 - 6 ) | 4.0 ( 3 - 6 )                                                                                                                                | 5.0 ( 3 - 8 ) |         |                                                                                                                                                                                                                                                                                                                                                        |         |         |                                                                                                                                     |         |         |                                                                                                                                                                                                                                                         |  |  |
| Stage IV                                                                                                                                                                                              | <b>40</b> | 2.0 ( 1 - 4 )                                                                                                                                                                                                     | 1.0 ( 1 - 2 )   | 1.0 ( 1 - 3 ) |                                                                                                                                                         |               |               |                                                                                                                                                                               |               |               |                                                                                                                                              |               |         |                                                                                                                                                                                                                                                                                                                                                        |         |         |                                                                                                                                     |         |         |                                                                                                                                                                                                                                                         |  |  |
| <b>Pancreas</b>                                                                                                                                                                                       | <b>41</b> |                                                                                                                                                                                                                   |                 |               |                                                                                                                                                         |               | 9.0 ( 8 - 9 ) |                                                                                                                                                                               |               |               |                                                                                                                                              |               |         |                                                                                                                                                                                                                                                                                                                                                        |         |         |                                                                                                                                     |         |         |                                                                                                                                                                                                                                                         |  |  |
| Stage I                                                                                                                                                                                               | <b>42</b> |                                                                                                                                                                                                                   |                 | 4.0 ( 3 - 7 ) |                                                                                                                                                         |               |               | 1.0 ( 1 - 2 )                                                                                                                                                                 | 5.0 ( 5 - 9 ) | 5.0 ( 3 - 9 ) | 6.0 ( 4 - 9 )                                                                                                                                | 6.5 ( 4 - 9 ) |         |                                                                                                                                                                                                                                                                                                                                                        |         |         |                                                                                                                                     |         |         |                                                                                                                                                                                                                                                         |  |  |
| Stage II                                                                                                                                                                                              | <b>43</b> |                                                                                                                                                                                                                   |                 | 2.5 ( 1 - 5 ) |                                                                                                                                                         |               |               | 1.0 ( 1 - 2 )                                                                                                                                                                 | 3.0 ( 2 - 7 ) | 3.0 ( 1 - 6 ) | 4.0 ( 2 - 9 )                                                                                                                                | 5.0 ( 2 - 8 ) |         |                                                                                                                                                                                                                                                                                                                                                        |         |         |                                                                                                                                     |         |         |                                                                                                                                                                                                                                                         |  |  |
| Stage III                                                                                                                                                                                             | <b>44</b> |                                                                                                                                                                                                                   |                 | 1.0 ( 1 - 3 ) |                                                                                                                                                         |               |               | 1.0 ( 1 - 1 )                                                                                                                                                                 | 2.0 ( 1 - 4 ) | 1.0 ( 1 - 3 ) | 2.0 ( 1 - 4 )                                                                                                                                | 4.0 ( 1 - 6 ) |         |                                                                                                                                                                                                                                                                                                                                                        |         |         |                                                                                                                                     |         |         |                                                                                                                                                                                                                                                         |  |  |
| Stage IV                                                                                                                                                                                              | <b>45</b> |                                                                                                                                                                                                                   |                 | 1.0 ( 1 - 1 ) |                                                                                                                                                         |               |               |                                                                                                                                                                               |               |               |                                                                                                                                              |               |         |                                                                                                                                                                                                                                                                                                                                                        |         |         |                                                                                                                                     |         |         |                                                                                                                                                                                                                                                         |  |  |

| Please enter a rating in each yellow cell, where each cell represents a cancer or cancer stage.<br><br>If there is heterogeneity within a category, do your best to imagine a <b>typical</b> patient. |           | Q1: What is the likelihood that adults diagnosed with this cancer at this stage today will be cured [1] with <b>typical treatment</b> [2]?                                                                        |                 |               | Q2: What is the likelihood that <b>untreated adults</b> with stage I or II of this cancer will progress to stage III or IV disease over their lifetime? |               |               | Q3: How long does it take this cancer to progress from the beginning of this stage [3] to the beginning of the next stage in undiagnosed adults (natural history of disease)? |               |               | Q4: ... <b>life expectancy</b> increase in <b>all</b> patients with this cancer, relative to life expectancy without the screening test [6]?                                                                                                                                                                                                           |               |               | Q5: Assume patients are receiving <b>typical treatment</b> ... <b>cure rates</b> increase in <b>all</b> patients with this cancer, relative to cure rates without the screening test? |               |               | Q6: Assume patients are receiving <b>typical treatment</b> Q6: Assume patients are receiving <b>best available treatment</b> [7]. |               |               | Q7: If all cancers of this type were diagnosed no later than this stage, to what extent would <b>cure rates</b> increase with <b>typical treatment</b> in <b>all</b> patients with this cancer, relative to 2030 cure rates without the screening test? |  |  |
|-------------------------------------------------------------------------------------------------------------------------------------------------------------------------------------------------------|-----------|-------------------------------------------------------------------------------------------------------------------------------------------------------------------------------------------------------------------|-----------------|---------------|---------------------------------------------------------------------------------------------------------------------------------------------------------|---------------|---------------|-------------------------------------------------------------------------------------------------------------------------------------------------------------------------------|---------------|---------------|--------------------------------------------------------------------------------------------------------------------------------------------------------------------------------------------------------------------------------------------------------------------------------------------------------------------------------------------------------|---------------|---------------|---------------------------------------------------------------------------------------------------------------------------------------------------------------------------------------|---------------|---------------|-----------------------------------------------------------------------------------------------------------------------------------|---------------|---------------|---------------------------------------------------------------------------------------------------------------------------------------------------------------------------------------------------------------------------------------------------------|--|--|
|                                                                                                                                                                                                       |           | For columns <b>A</b> through <b>F</b> , enter a rating of 1 through 9, where:<br>1=Extremely unlikely<br>3=Somewhat unlikely<br>5=Neutral, neither likely nor unlikely<br>7=Somewhat likely<br>9=Extremely likely |                 |               |                                                                                                                                                         |               |               | For column <b>G</b> , enter a rating of 1 through 9, where:<br>1=Less than 1 year<br>5=5 years<br>9=9 or more years                                                           |               |               | For columns <b>H</b> through <b>K</b> , enter a rating of 1 through 9, where your answer reflects your judgement about how much the outcome of interest (e.g., life expectancy in Q4 and cure rates in Q5, Q6, Q7) would increase:<br>1=Not at all<br>3=Slightly<br>5=Moderately<br>7=Considerably<br>9=A great deal, doubling the outcome of interest |               |               |                                                                                                                                                                                       |               |               |                                                                                                                                   |               |               |                                                                                                                                                                                                                                                         |  |  |
|                                                                                                                                                                                                       |           | Lower risk [8]                                                                                                                                                                                                    | Higher risk [9] | Overall       | Lower risk                                                                                                                                              | Higher risk   | Overall       | Overall                                                                                                                                                                       | Overall       | Overall       | Overall                                                                                                                                                                                                                                                                                                                                                | Overall       | Overall       | Overall                                                                                                                                                                               | Overall       | Overall       | Overall                                                                                                                           | Overall       | Overall       | Overall                                                                                                                                                                                                                                                 |  |  |
| <b>A</b>                                                                                                                                                                                              | <b>B</b>  | <b>C</b>                                                                                                                                                                                                          | <b>D</b>        | <b>E</b>      | <b>F</b>                                                                                                                                                | <b>G</b>      | <b>H</b>      | <b>I</b>                                                                                                                                                                      | <b>J</b>      | <b>K</b>      |                                                                                                                                                                                                                                                                                                                                                        |               |               |                                                                                                                                                                                       |               |               |                                                                                                                                   |               |               |                                                                                                                                                                                                                                                         |  |  |
| <b>Thyroid</b>                                                                                                                                                                                        | <b>46</b> |                                                                                                                                                                                                                   |                 |               |                                                                                                                                                         |               |               |                                                                                                                                                                               |               |               |                                                                                                                                                                                                                                                                                                                                                        |               |               |                                                                                                                                                                                       |               |               |                                                                                                                                   |               |               |                                                                                                                                                                                                                                                         |  |  |
| Stage I                                                                                                                                                                                               | 47        | 9.0 ( 9 - 9 )                                                                                                                                                                                                     | 6.0 ( 1 - 7 )   | 9.0 ( 8 - 9 ) | 4.0 ( 1 - 7 )                                                                                                                                           | 7.5 ( 6 - 9 ) | 5.0 ( 2 - 7 ) | 5.5 ( 4 - 8 )                                                                                                                                                                 | 3.0 ( 1 - 7 ) | 3.0 ( 1 - 7 ) | 3.0 ( 1 - 7 )                                                                                                                                                                                                                                                                                                                                          | 3.0 ( 1 - 7 ) | 3.0 ( 1 - 7 ) | 3.0 ( 1 - 7 )                                                                                                                                                                         | 3.0 ( 1 - 7 ) | 3.0 ( 1 - 7 ) | 3.0 ( 1 - 7 )                                                                                                                     | 3.0 ( 1 - 7 ) | 3.0 ( 1 - 7 ) |                                                                                                                                                                                                                                                         |  |  |
| Stage II                                                                                                                                                                                              | 48        | 9.0 ( 8 - 9 )                                                                                                                                                                                                     | 5.0 ( 1 - 6 )   | 8.0 ( 7 - 9 ) |                                                                                                                                                         |               |               | 5.0 ( 3 - 7 )                                                                                                                                                                 | 3.0 ( 1 - 5 ) | 3.0 ( 1 - 5 ) | 3.0 ( 1 - 5 )                                                                                                                                                                                                                                                                                                                                          | 3.0 ( 1 - 5 ) | 3.0 ( 1 - 5 ) | 3.0 ( 1 - 5 )                                                                                                                                                                         | 3.0 ( 1 - 5 ) | 3.0 ( 1 - 5 ) | 3.0 ( 1 - 5 )                                                                                                                     | 3.0 ( 1 - 5 ) | 3.0 ( 1 - 5 ) |                                                                                                                                                                                                                                                         |  |  |
| Stage III                                                                                                                                                                                             | 49        | 8.0 ( 7 - 9 )                                                                                                                                                                                                     | 3.0 ( 1 - 4 )   | 7.0 ( 6 - 9 ) |                                                                                                                                                         |               |               | 4.0 ( 2 - 5 )                                                                                                                                                                 | 3.0 ( 2 - 5 ) | 3.0 ( 2 - 5 ) | 3.0 ( 2 - 5 )                                                                                                                                                                                                                                                                                                                                          | 3.0 ( 2 - 5 ) | 3.0 ( 2 - 5 ) | 3.0 ( 2 - 5 )                                                                                                                                                                         | 3.0 ( 2 - 5 ) | 3.0 ( 2 - 5 ) | 3.0 ( 2 - 5 )                                                                                                                     | 3.0 ( 2 - 5 ) | 3.0 ( 2 - 5 ) |                                                                                                                                                                                                                                                         |  |  |
| Stage IV                                                                                                                                                                                              | 50        | 6.0 ( 1 - 7 )                                                                                                                                                                                                     | 1.0 ( 1 - 2 )   | 5.0 ( 1 - 7 ) |                                                                                                                                                         |               |               |                                                                                                                                                                               |               |               |                                                                                                                                                                                                                                                                                                                                                        |               |               |                                                                                                                                                                                       |               |               |                                                                                                                                   |               |               |                                                                                                                                                                                                                                                         |  |  |
| <b>Bladder</b>                                                                                                                                                                                        | <b>51</b> |                                                                                                                                                                                                                   |                 |               |                                                                                                                                                         |               | 7.0 ( 5 - 9 ) |                                                                                                                                                                               |               |               |                                                                                                                                                                                                                                                                                                                                                        |               |               |                                                                                                                                                                                       |               |               |                                                                                                                                   |               |               |                                                                                                                                                                                                                                                         |  |  |
| Stage I                                                                                                                                                                                               | 52        |                                                                                                                                                                                                                   |                 | 8.5 ( 7 - 9 ) |                                                                                                                                                         |               |               | 3.0 ( 2 - 5 )                                                                                                                                                                 | 6.0 ( 5 - 7 ) | 6.0 ( 5 - 7 ) | 6.0 ( 5 - 7 )                                                                                                                                                                                                                                                                                                                                          | 6.0 ( 5 - 7 ) | 6.0 ( 5 - 7 ) | 6.0 ( 5 - 7 )                                                                                                                                                                         | 6.0 ( 5 - 7 ) | 6.0 ( 5 - 7 ) | 6.0 ( 5 - 7 )                                                                                                                     | 6.0 ( 5 - 7 ) | 7.0 ( 5 - 8 ) |                                                                                                                                                                                                                                                         |  |  |
| Stage II                                                                                                                                                                                              | 53        |                                                                                                                                                                                                                   |                 | 6.5 ( 6 - 8 ) |                                                                                                                                                         |               |               | 2.0 ( 1 - 5 )                                                                                                                                                                 | 5.0 ( 4 - 6 ) | 4.0 ( 3 - 6 ) | 4.0 ( 3 - 6 )                                                                                                                                                                                                                                                                                                                                          | 4.0 ( 3 - 6 ) | 4.0 ( 3 - 6 ) | 4.0 ( 3 - 6 )                                                                                                                                                                         | 4.0 ( 3 - 6 ) | 4.0 ( 3 - 6 ) | 4.0 ( 3 - 6 )                                                                                                                     | 4.0 ( 3 - 6 ) | 6.0 ( 4 - 6 ) |                                                                                                                                                                                                                                                         |  |  |
| Stage III                                                                                                                                                                                             | 54        |                                                                                                                                                                                                                   |                 | 4.0 ( 3 - 5 ) |                                                                                                                                                         |               |               | 1.0 ( 1 - 2 )                                                                                                                                                                 | 3.0 ( 2 - 4 ) | 3.0 ( 2 - 5 ) | 3.0 ( 2 - 5 )                                                                                                                                                                                                                                                                                                                                          | 3.0 ( 2 - 5 ) | 3.0 ( 2 - 5 ) | 3.0 ( 2 - 5 )                                                                                                                                                                         | 3.0 ( 2 - 5 ) | 3.0 ( 2 - 5 ) | 3.0 ( 2 - 5 )                                                                                                                     | 3.0 ( 2 - 5 ) | 4.0 ( 3 - 7 ) |                                                                                                                                                                                                                                                         |  |  |
| Stage IV                                                                                                                                                                                              | 55        |                                                                                                                                                                                                                   |                 | 1.0 ( 1 - 2 ) |                                                                                                                                                         |               |               |                                                                                                                                                                               |               |               |                                                                                                                                                                                                                                                                                                                                                        |               |               |                                                                                                                                                                                       |               |               |                                                                                                                                   |               |               |                                                                                                                                                                                                                                                         |  |  |
| <b>Liver/Intrahepatic Bile-duct</b>                                                                                                                                                                   | <b>56</b> |                                                                                                                                                                                                                   |                 |               | 7.0 ( 5 - 8 )                                                                                                                                           | 8.0 ( 5 - 9 ) | 7.5 ( 6 - 9 ) |                                                                                                                                                                               |               |               |                                                                                                                                                                                                                                                                                                                                                        |               |               |                                                                                                                                                                                       |               |               |                                                                                                                                   |               |               |                                                                                                                                                                                                                                                         |  |  |
| Stage I                                                                                                                                                                                               | 57        | 5.0 ( 3 - 7 )                                                                                                                                                                                                     | 3.5 ( 1 - 6 )   | 4.0 ( 2 - 7 ) |                                                                                                                                                         |               |               | 2.0 ( 1 - 3 )                                                                                                                                                                 | 6.5 ( 4 - 7 ) | 6.0 ( 4 - 7 ) | 6.0 ( 4 - 7 )                                                                                                                                                                                                                                                                                                                                          | 6.5 ( 4 - 8 ) | 6.5 ( 4 - 8 ) | 6.5 ( 4 - 8 )                                                                                                                                                                         | 6.5 ( 4 - 8 ) | 6.5 ( 4 - 8 ) | 6.5 ( 4 - 8 )                                                                                                                     | 6.5 ( 4 - 8 ) | 7.0 ( 5 - 8 ) |                                                                                                                                                                                                                                                         |  |  |
| Stage II                                                                                                                                                                                              | 58        | 3.0 ( 2 - 7 )                                                                                                                                                                                                     | 2.0 ( 1 - 7 )   | 3.0 ( 2 - 7 ) |                                                                                                                                                         |               |               | 1.0 ( 1 - 2 )                                                                                                                                                                 | 5.0 ( 3 - 6 ) | 4.5 ( 2 - 5 ) | 4.5 ( 2 - 5 )                                                                                                                                                                                                                                                                                                                                          | 5.0 ( 4 - 6 ) | 5.0 ( 4 - 6 ) | 5.0 ( 4 - 6 )                                                                                                                                                                         | 5.0 ( 4 - 6 ) | 5.0 ( 4 - 6 ) | 5.0 ( 4 - 6 )                                                                                                                     | 5.0 ( 4 - 6 ) | 6.0 ( 4 - 6 ) |                                                                                                                                                                                                                                                         |  |  |
| Stage III                                                                                                                                                                                             | 59        | 2.0 ( 1 - 5 )                                                                                                                                                                                                     | 1.0 ( 1 - 5 )   | 1.5 ( 1 - 5 ) |                                                                                                                                                         |               |               | 1.0 ( 1 - 1 )                                                                                                                                                                 | 2.5 ( 2 - 5 ) | 2.0 ( 1 - 5 ) | 2.0 ( 1 - 5 )                                                                                                                                                                                                                                                                                                                                          | 2.5 ( 1 - 5 ) | 2.5 ( 1 - 5 ) | 2.5 ( 1 - 5 )                                                                                                                                                                         | 2.5 ( 1 - 5 ) | 2.5 ( 1 - 5 ) | 2.5 ( 1 - 5 )                                                                                                                     | 2.5 ( 1 - 5 ) | 4.0 ( 3 - 6 ) |                                                                                                                                                                                                                                                         |  |  |
| Stage IV                                                                                                                                                                                              | 60        | 1.0 ( 1 - 1 )                                                                                                                                                                                                     | 1.0 ( 1 - 1 )   | 1.0 ( 1 - 1 ) |                                                                                                                                                         |               |               |                                                                                                                                                                               |               |               |                                                                                                                                                                                                                                                                                                                                                        |               |               |                                                                                                                                                                                       |               |               |                                                                                                                                   |               |               |                                                                                                                                                                                                                                                         |  |  |
| <b>Ovary</b>                                                                                                                                                                                          | <b>61</b> |                                                                                                                                                                                                                   |                 |               | 7.0 ( 5 - 9 )                                                                                                                                           | 8.0 ( 8 - 9 ) | 8.0 ( 7 - 9 ) |                                                                                                                                                                               |               |               |                                                                                                                                                                                                                                                                                                                                                        |               |               |                                                                                                                                                                                       |               |               |                                                                                                                                   |               |               |                                                                                                                                                                                                                                                         |  |  |
| Stage I                                                                                                                                                                                               | 62        | 9.0 ( 6 - 9 )                                                                                                                                                                                                     | 8.0 ( 3 - 8 )   | 8.0 ( 7 - 9 ) |                                                                                                                                                         |               |               | 3.0 ( 1 - 3 )                                                                                                                                                                 | 7.0 ( 6 - 8 ) | 7.0 ( 6 - 8 ) | 7.0 ( 6 - 8 )                                                                                                                                                                                                                                                                                                                                          | 7.0 ( 6 - 8 ) | 7.0 ( 6 - 8 ) | 7.0 ( 6 - 8 )                                                                                                                                                                         | 7.0 ( 6 - 8 ) | 7.0 ( 6 - 8 ) | 7.0 ( 6 - 8 )                                                                                                                     | 7.0 ( 6 - 8 ) | 8.0 ( 6 - 9 ) |                                                                                                                                                                                                                                                         |  |  |
| Stage II                                                                                                                                                                                              | 63        | 8.0 ( 4 - 9 )                                                                                                                                                                                                     | 6.0 ( 3 - 7 )   | 7.0 ( 5 - 8 ) |                                                                                                                                                         |               |               | 2.0 ( 1 - 2 )                                                                                                                                                                 | 6.0 ( 5 - 8 ) | 5.0 ( 5 - 8 ) | 5.0 ( 5 - 8 )                                                                                                                                                                                                                                                                                                                                          | 6.0 ( 5 - 8 ) | 6.0 ( 5 - 8 ) | 6.0 ( 5 - 8 )                                                                                                                                                                         | 6.0 ( 5 - 8 ) | 6.0 ( 5 - 8 ) | 6.0 ( 5 - 8 )                                                                                                                     | 6.0 ( 5 - 8 ) | 7.0 ( 6 - 8 ) |                                                                                                                                                                                                                                                         |  |  |
| Stage III                                                                                                                                                                                             | 64        | 7.0 ( 5 - 9 )                                                                                                                                                                                                     | 2.0 ( 1 - 4 )   | 3.0 ( 2 - 5 ) |                                                                                                                                                         |               |               | 1.0 ( 1 - 1 )                                                                                                                                                                 | 3.0 ( 1 - 5 ) | 3.0 ( 1 - 6 ) | 3.0 ( 1 - 6 )                                                                                                                                                                                                                                                                                                                                          | 3.0 ( 1 - 6 ) | 3.0 ( 1 - 6 ) | 3.0 ( 1 - 6 )                                                                                                                                                                         | 3.0 ( 1 - 6 ) | 3.0 ( 1 - 6 ) | 3.0 ( 1 - 6 )                                                                                                                     | 3.0 ( 1 - 6 ) | 5.0 ( 3 - 7 ) |                                                                                                                                                                                                                                                         |  |  |
| Stage IV                                                                                                                                                                                              | 65        | 5.5 ( 1 - 9 )                                                                                                                                                                                                     | 1.0 ( 1 - 1 )   | 1.0 ( 1 - 3 ) |                                                                                                                                                         |               |               |                                                                                                                                                                               |               |               |                                                                                                                                                                                                                                                                                                                                                        |               |               |                                                                                                                                                                                       |               |               |                                                                                                                                   |               |               |                                                                                                                                                                                                                                                         |  |  |
| <b>Stomach</b>                                                                                                                                                                                        | <b>66</b> |                                                                                                                                                                                                                   |                 |               | 7.0 ( 6 - 8 )                                                                                                                                           | 9.0 ( 7 - 9 ) | 8.0 ( 7 - 9 ) |                                                                                                                                                                               |               |               |                                                                                                                                                                                                                                                                                                                                                        |               |               |                                                                                                                                                                                       |               |               |                                                                                                                                   |               |               |                                                                                                                                                                                                                                                         |  |  |
| Stage I                                                                                                                                                                                               | 67        | 8.0 ( 6 - 9 )                                                                                                                                                                                                     | 7.0 ( 5 - 7 )   | 7.0 ( 6 - 8 ) |                                                                                                                                                         |               |               | 3.0 ( 2 - 5 )                                                                                                                                                                 | 7.0 ( 6 - 8 ) | 7.0 ( 5 - 8 ) | 7.0 ( 5 - 8 )                                                                                                                                                                                                                                                                                                                                          | 7.0 ( 6 - 8 ) | 7.0 ( 6 - 8 ) | 7.0 ( 6 - 8 )                                                                                                                                                                         | 7.0 ( 6 - 8 ) | 7.0 ( 6 - 8 ) | 7.0 ( 6 - 8 )                                                                                                                     | 7.0 ( 6 - 8 ) | 8.0 ( 6 - 9 ) |                                                                                                                                                                                                                                                         |  |  |
| Stage II                                                                                                                                                                                              | 68        | 5.0 ( 4 - 7 )                                                                                                                                                                                                     | 4.0 ( 3 - 6 )   | 4.5 ( 2 - 7 ) |                                                                                                                                                         |               |               | 2.0 ( 1 - 2 )                                                                                                                                                                 | 5.0 ( 4 - 8 ) | 5.0 ( 3 - 7 ) | 5.0 ( 3 - 7 )                                                                                                                                                                                                                                                                                                                                          | 5.5 ( 4 - 8 ) | 5.5 ( 4 - 8 ) | 5.5 ( 4 - 8 )                                                                                                                                                                         | 5.5 ( 4 - 8 ) | 5.5 ( 4 - 8 ) | 5.5 ( 4 - 8 )                                                                                                                     | 5.5 ( 4 - 8 ) | 6.0 ( 5 - 9 ) |                                                                                                                                                                                                                                                         |  |  |
| Stage III                                                                                                                                                                                             | 69        | 3.0 ( 1 - 6 )                                                                                                                                                                                                     | 2.0 ( 1 - 4 )   | 2.0 ( 1 - 5 ) |                                                                                                                                                         |               |               | 1.0 ( 1 - 2 )                                                                                                                                                                 | 3.0 ( 2 - 5 ) | 3.0 ( 1 - 4 ) | 3.0 ( 1 - 4 )                                                                                                                                                                                                                                                                                                                                          | 3.0 ( 2 - 5 ) | 3.0 ( 2 - 5 ) | 3.0 ( 2 - 5 )                                                                                                                                                                         | 3.0 ( 2 - 5 ) | 3.0 ( 2 - 5 ) | 3.0 ( 2 - 5 )                                                                                                                     | 3.0 ( 2 - 5 ) | 4.0 ( 2 - 6 ) |                                                                                                                                                                                                                                                         |  |  |
| Stage IV                                                                                                                                                                                              | 70        | 1.0 ( 1 - 2 )                                                                                                                                                                                                     | 1.0 ( 1 - 1 )   | 1.0 ( 1 - 1 ) |                                                                                                                                                         |               |               |                                                                                                                                                                               |               |               |                                                                                                                                                                                                                                                                                                                                                        |               |               |                                                                                                                                                                                       |               |               |                                                                                                                                   |               |               |                                                                                                                                                                                                                                                         |  |  |
| <b>Esophagus</b>                                                                                                                                                                                      | <b>71</b> |                                                                                                                                                                                                                   |                 |               | 7.5 ( 7 - 8 )                                                                                                                                           | 9.0 ( 8 - 9 ) | 8.0 ( 8 - 9 ) |                                                                                                                                                                               |               |               |                                                                                                                                                                                                                                                                                                                                                        |               |               |                                                                                                                                                                                       |               |               |                                                                                                                                   |               |               |                                                                                                                                                                                                                                                         |  |  |
| Stage I                                                                                                                                                                                               | 72        | 7.0 ( 4 - 9 )                                                                                                                                                                                                     | 6.0 ( 5 - 7 )   | 7.0 ( 5 - 8 ) |                                                                                                                                                         |               |               | 2.5 ( 2 - 5 )                                                                                                                                                                 | 7.0 ( 6 - 9 ) | 7.0 ( 5 - 7 ) | 7.0 ( 5 - 7 )                                                                                                                                                                                                                                                                                                                                          | 7.0 ( 6 - 9 ) | 7.0 ( 6 - 9 ) | 7.0 ( 6 - 9 )                                                                                                                                                                         | 7.0 ( 6 - 9 ) | 7.0 ( 6 - 9 ) | 7.0 ( 6 - 9 )                                                                                                                     | 7.0 ( 6 - 9 ) | 7.0 ( 6 - 9 ) |                                                                                                                                                                                                                                                         |  |  |
| Stage II                                                                                                                                                                                              | 73        | 4.0 ( 2 - 6 )                                                                                                                                                                                                     | 3.5 ( 3 - 6 )   | 4.0 ( 3 - 7 ) |                                                                                                                                                         |               |               | 1.0 ( 1 - 2 )                                                                                                                                                                 | 4.5 ( 3 - 8 ) | 4.5 ( 3 - 7 ) | 4.5 ( 3 - 7 )                                                                                                                                                                                                                                                                                                                                          | 5.0 ( 4 - 8 ) | 5.0 ( 4 - 8 ) | 5.0 ( 4 - 8 )                                                                                                                                                                         | 5.0 ( 4 - 8 ) | 5.0 ( 4 - 8 ) | 5.0 ( 4 - 8 )                                                                                                                     | 5.0 ( 4 - 8 ) | 6.0 ( 5 - 9 ) |                                                                                                                                                                                                                                                         |  |  |
| Stage III                                                                                                                                                                                             | 74        | 2.5 ( 1 - 4 )                                                                                                                                                                                                     | 2.0 ( 1 - 4 )   | 2.0 ( 1 - 5 ) |                                                                                                                                                         |               |               | 1.0 ( 1 - 2 )                                                                                                                                                                 | 2.0 ( 2 - 5 ) | 2.0 ( 1 - 4 ) | 2.0 ( 1 - 4 )                                                                                                                                                                                                                                                                                                                                          | 3.0 ( 2 - 5 ) | 3.0 ( 2 - 5 ) | 3.0 ( 2 - 5 )                                                                                                                                                                         | 3.0 ( 2 - 5 ) | 3.0 ( 2 - 5 ) | 3.0 ( 2 - 5 )                                                                                                                     | 3.0 ( 2 - 5 ) | 4.0 ( 3 - 6 ) |                                                                                                                                                                                                                                                         |  |  |
| Stage IV                                                                                                                                                                                              | 75        | 1.0 ( 1 - 2 )                                                                                                                                                                                                     | 1.0 ( 1 - 1 )   | 1.0 ( 1 - 1 ) |                                                                                                                                                         |               |               |                                                                                                                                                                               |               |               |                                                                                                                                                                                                                                                                                                                                                        |               |               |                                                                                                                                                                                       |               |               |                                                                                                                                   |               |               |                                                                                                                                                                                                                                                         |  |  |

| Please enter a rating in each yellow cell, where each cell represents a cancer or cancer stage.<br><br>If there is heterogeneity within a category, do your best to imagine a <b>typical</b> patient. |           | Q1: What is the likelihood that adults diagnosed with this cancer at this stage today will be cured [1] with <b>typical treatment</b> [2]?                                                                        |                 |               | Q2: What is the likelihood that <b>untreated adults</b> with stage I or II of this cancer will progress to stage III or IV disease over their lifetime? |                      |               | Q3: How long does it take this cancer to progress from the beginning of this stage [3] to the beginning of the next stage in undiagnosed adults (natural history of disease)? |               |          | Q4: ... <b>life expectancy</b> increase in <b>all</b> patients with this cancer, relative to life expectancy without the screening test [6]? |               |               | Q5: Assume patients are receiving <b>typical treatment</b> ... <b>cure rates</b> increase in <b>all</b> patients with this cancer, relative to cure rates without the screening test?                                                                                                                                                                  |               |         | Q6: Assume patients are receiving <b>typical treatment</b>   Q6: Assume patients are receiving <b>best available treatment</b> [7]. |         |         | Q7: If all cancers of this type were diagnosed no later than this stage, to what extent would <b>cure rates</b> increase with <b>typical treatment</b> in <b>all</b> patients with this cancer, relative to 2030 cure rates without the screening test? |  |  |
|-------------------------------------------------------------------------------------------------------------------------------------------------------------------------------------------------------|-----------|-------------------------------------------------------------------------------------------------------------------------------------------------------------------------------------------------------------------|-----------------|---------------|---------------------------------------------------------------------------------------------------------------------------------------------------------|----------------------|---------------|-------------------------------------------------------------------------------------------------------------------------------------------------------------------------------|---------------|----------|----------------------------------------------------------------------------------------------------------------------------------------------|---------------|---------------|--------------------------------------------------------------------------------------------------------------------------------------------------------------------------------------------------------------------------------------------------------------------------------------------------------------------------------------------------------|---------------|---------|-------------------------------------------------------------------------------------------------------------------------------------|---------|---------|---------------------------------------------------------------------------------------------------------------------------------------------------------------------------------------------------------------------------------------------------------|--|--|
|                                                                                                                                                                                                       |           | For columns <b>A</b> through <b>F</b> , enter a rating of 1 through 9, where:<br>1=Extremely unlikely<br>3=Somewhat unlikely<br>5=Neutral, neither likely nor unlikely<br>7=Somewhat likely<br>9=Extremely likely |                 |               |                                                                                                                                                         |                      |               | For column <b>G</b> , enter a rating of 1 through 9, where:<br>1=Less than 1 year<br>5=5 years<br>9=9 or more years                                                           |               |          |                                                                                                                                              |               |               | For columns <b>H</b> through <b>K</b> , enter a rating of 1 through 9, where your answer reflects your judgement about how much the outcome of interest (e.g., life expectancy in Q4 and cure rates in Q5, Q6, Q7) would increase:<br>1=Not at all<br>3=Slightly<br>5=Moderately<br>7=Considerably<br>9=A great deal, doubling the outcome of interest |               |         |                                                                                                                                     |         |         |                                                                                                                                                                                                                                                         |  |  |
|                                                                                                                                                                                                       |           | Lower risk [8]                                                                                                                                                                                                    | Higher risk [9] | Overall       | Lower risk                                                                                                                                              | Higher risk          | Overall       | Overall                                                                                                                                                                       | Overall       | Overall  | Overall                                                                                                                                      | Overall       | Overall       | Overall                                                                                                                                                                                                                                                                                                                                                | Overall       | Overall | Overall                                                                                                                             | Overall | Overall | Overall                                                                                                                                                                                                                                                 |  |  |
| <b>A</b>                                                                                                                                                                                              | <b>B</b>  | <b>C</b>                                                                                                                                                                                                          | <b>D</b>        | <b>E</b>      | <b>F</b>                                                                                                                                                | <b>G</b>             | <b>H</b>      | <b>I</b>                                                                                                                                                                      | <b>J</b>      | <b>K</b> |                                                                                                                                              |               |               |                                                                                                                                                                                                                                                                                                                                                        |               |         |                                                                                                                                     |         |         |                                                                                                                                                                                                                                                         |  |  |
| <b>Gallbladder</b>                                                                                                                                                                                    | <b>76</b> |                                                                                                                                                                                                                   |                 |               |                                                                                                                                                         | <b>9.0 ( 4 - 9 )</b> |               |                                                                                                                                                                               |               |          |                                                                                                                                              |               |               |                                                                                                                                                                                                                                                                                                                                                        |               |         |                                                                                                                                     |         |         |                                                                                                                                                                                                                                                         |  |  |
| Stage I                                                                                                                                                                                               | 77        |                                                                                                                                                                                                                   |                 |               |                                                                                                                                                         | 5.0 ( 4 - 6 )        |               |                                                                                                                                                                               |               |          | 2.0 ( 1 - 3 )                                                                                                                                | 7.0 ( 4 - 8 ) | 6.0 ( 5 - 8 ) | 6.5 ( 5 - 8 )                                                                                                                                                                                                                                                                                                                                          | 7.0 ( 5 - 8 ) |         |                                                                                                                                     |         |         |                                                                                                                                                                                                                                                         |  |  |
| Stage II                                                                                                                                                                                              | 78        |                                                                                                                                                                                                                   |                 |               |                                                                                                                                                         | 3.0 ( 2 - 5 )        |               |                                                                                                                                                                               |               |          | 1.0 ( 1 - 1 )                                                                                                                                | 4.5 ( 3 - 5 ) | 4.0 ( 3 - 5 ) | 5.0 ( 3 - 6 )                                                                                                                                                                                                                                                                                                                                          | 5.0 ( 4 - 6 ) |         |                                                                                                                                     |         |         |                                                                                                                                                                                                                                                         |  |  |
| Stage III                                                                                                                                                                                             | 79        |                                                                                                                                                                                                                   |                 |               |                                                                                                                                                         | 2.0 ( 1 - 3 )        |               |                                                                                                                                                                               |               |          | 1.0 ( 1 - 1 )                                                                                                                                | 2.0 ( 1 - 4 ) | 2.0 ( 1 - 4 ) | 2.0 ( 1 - 4 )                                                                                                                                                                                                                                                                                                                                          | 3.0 ( 2 - 5 ) |         |                                                                                                                                     |         |         |                                                                                                                                                                                                                                                         |  |  |
| Stage IV                                                                                                                                                                                              | 80        |                                                                                                                                                                                                                   |                 |               |                                                                                                                                                         | 1.0 ( 1 - 1 )        |               |                                                                                                                                                                               |               |          |                                                                                                                                              |               |               |                                                                                                                                                                                                                                                                                                                                                        |               |         |                                                                                                                                     |         |         |                                                                                                                                                                                                                                                         |  |  |
| <b>Cervix</b>                                                                                                                                                                                         | <b>81</b> |                                                                                                                                                                                                                   |                 |               |                                                                                                                                                         | <b>8.0 ( 7 - 9 )</b> |               |                                                                                                                                                                               |               |          |                                                                                                                                              |               |               |                                                                                                                                                                                                                                                                                                                                                        |               |         |                                                                                                                                     |         |         |                                                                                                                                                                                                                                                         |  |  |
| Stage I                                                                                                                                                                                               | 82        |                                                                                                                                                                                                                   |                 |               |                                                                                                                                                         | 9.0 ( 8 - 9 )        |               |                                                                                                                                                                               |               |          | 4.0 ( 1 - 5 )                                                                                                                                | 7.0 ( 5 - 8 ) | 7.0 ( 5 - 8 ) | 7.0 ( 6 - 8 )                                                                                                                                                                                                                                                                                                                                          | 7.0 ( 5 - 8 ) |         |                                                                                                                                     |         |         |                                                                                                                                                                                                                                                         |  |  |
| Stage II                                                                                                                                                                                              | 83        |                                                                                                                                                                                                                   |                 |               |                                                                                                                                                         | 7.0 ( 6 - 8 )        |               |                                                                                                                                                                               |               |          | 2.5 ( 1 - 4 )                                                                                                                                | 5.5 ( 4 - 7 ) | 5.5 ( 4 - 7 ) | 6.0 ( 5 - 7 )                                                                                                                                                                                                                                                                                                                                          | 6.0 ( 5 - 7 ) |         |                                                                                                                                     |         |         |                                                                                                                                                                                                                                                         |  |  |
| Stage III                                                                                                                                                                                             | 84        |                                                                                                                                                                                                                   |                 |               |                                                                                                                                                         | 5.0 ( 4 - 6 )        |               |                                                                                                                                                                               |               |          | 1.0 ( 1 - 2 )                                                                                                                                | 3.0 ( 3 - 6 ) | 3.0 ( 2 - 6 ) | 4.0 ( 2 - 6 )                                                                                                                                                                                                                                                                                                                                          | 4.5 ( 3 - 7 ) |         |                                                                                                                                     |         |         |                                                                                                                                                                                                                                                         |  |  |
| Stage IV                                                                                                                                                                                              | 85        |                                                                                                                                                                                                                   |                 |               |                                                                                                                                                         | 1.0 ( 1 - 3 )        |               |                                                                                                                                                                               |               |          |                                                                                                                                              |               |               |                                                                                                                                                                                                                                                                                                                                                        |               |         |                                                                                                                                     |         |         |                                                                                                                                                                                                                                                         |  |  |
| <b>Sarcoma</b>                                                                                                                                                                                        | <b>86</b> |                                                                                                                                                                                                                   |                 |               |                                                                                                                                                         |                      | 5.5 ( 4 - 9 ) | 8.0 ( 7 - 9 )                                                                                                                                                                 | 7.5 ( 6 - 9 ) |          |                                                                                                                                              |               |               |                                                                                                                                                                                                                                                                                                                                                        |               |         |                                                                                                                                     |         |         |                                                                                                                                                                                                                                                         |  |  |
| Stage I                                                                                                                                                                                               | 87        | 8.5 ( 8 - 9 )                                                                                                                                                                                                     | 7.0 ( 5 - 8 )   | 8.0 ( 6 - 8 ) |                                                                                                                                                         |                      |               |                                                                                                                                                                               |               |          | 3.5 ( 1 - 6 )                                                                                                                                | 7.0 ( 5 - 8 ) | 7.0 ( 6 - 8 ) | 7.0 ( 7 - 8 )                                                                                                                                                                                                                                                                                                                                          | 8.0 ( 5 - 9 ) |         |                                                                                                                                     |         |         |                                                                                                                                                                                                                                                         |  |  |
| Stage II                                                                                                                                                                                              | 88        | 7.0 ( 6 - 9 )                                                                                                                                                                                                     | 6.0 ( 4 - 7 )   | 7.0 ( 4 - 7 ) |                                                                                                                                                         |                      |               |                                                                                                                                                                               |               |          | 2.0 ( 1 - 4 )                                                                                                                                | 5.0 ( 4 - 7 ) | 5.0 ( 4 - 7 ) | 6.0 ( 5 - 7 )                                                                                                                                                                                                                                                                                                                                          | 6.0 ( 5 - 7 ) |         |                                                                                                                                     |         |         |                                                                                                                                                                                                                                                         |  |  |
| Stage III                                                                                                                                                                                             | 89        | 4.5 ( 3 - 6 )                                                                                                                                                                                                     | 3.0 ( 1 - 4 )   | 4.0 ( 2 - 5 ) |                                                                                                                                                         |                      |               |                                                                                                                                                                               |               |          | 1.0 ( 1 - 2 )                                                                                                                                | 3.0 ( 2 - 5 ) | 3.0 ( 2 - 5 ) | 3.5 ( 2 - 5 )                                                                                                                                                                                                                                                                                                                                          | 4.5 ( 3 - 5 ) |         |                                                                                                                                     |         |         |                                                                                                                                                                                                                                                         |  |  |
| Stage IV                                                                                                                                                                                              | 90        | 1.0 ( 1 - 3 )                                                                                                                                                                                                     | 1.0 ( 1 - 1 )   | 1.0 ( 1 - 2 ) |                                                                                                                                                         |                      |               |                                                                                                                                                                               |               |          |                                                                                                                                              |               |               |                                                                                                                                                                                                                                                                                                                                                        |               |         |                                                                                                                                     |         |         |                                                                                                                                                                                                                                                         |  |  |
| <b>Urothelial Tract</b>                                                                                                                                                                               | <b>91</b> |                                                                                                                                                                                                                   |                 |               |                                                                                                                                                         | <b>8.5 ( 6 - 9 )</b> |               |                                                                                                                                                                               |               |          |                                                                                                                                              |               |               |                                                                                                                                                                                                                                                                                                                                                        |               |         |                                                                                                                                     |         |         |                                                                                                                                                                                                                                                         |  |  |
| Stage I                                                                                                                                                                                               | 92        |                                                                                                                                                                                                                   |                 |               |                                                                                                                                                         | 8.0 ( 6 - 9 )        |               |                                                                                                                                                                               |               |          | 3.0 ( 2 - 7 )                                                                                                                                | 7.0 ( 5 - 7 ) | 7.0 ( 5 - 7 ) | 7.0 ( 5 - 7 )                                                                                                                                                                                                                                                                                                                                          | 7.0 ( 5 - 7 ) |         |                                                                                                                                     |         |         |                                                                                                                                                                                                                                                         |  |  |
| Stage II                                                                                                                                                                                              | 93        |                                                                                                                                                                                                                   |                 |               |                                                                                                                                                         | 5.5 ( 5 - 7 )        |               |                                                                                                                                                                               |               |          | 2.0 ( 2 - 5 )                                                                                                                                | 5.0 ( 5 - 6 ) | 5.0 ( 4 - 6 ) | 5.0 ( 4 - 6 )                                                                                                                                                                                                                                                                                                                                          | 5.5 ( 5 - 7 ) |         |                                                                                                                                     |         |         |                                                                                                                                                                                                                                                         |  |  |
| Stage III                                                                                                                                                                                             | 94        |                                                                                                                                                                                                                   |                 |               |                                                                                                                                                         | 4.0 ( 3 - 5 )        |               |                                                                                                                                                                               |               |          | 1.0 ( 1 - 4 )                                                                                                                                | 3.0 ( 2 - 5 ) | 3.0 ( 2 - 4 ) | 3.0 ( 2 - 5 )                                                                                                                                                                                                                                                                                                                                          | 4.0 ( 3 - 6 ) |         |                                                                                                                                     |         |         |                                                                                                                                                                                                                                                         |  |  |
| Stage IV                                                                                                                                                                                              | 95        |                                                                                                                                                                                                                   |                 |               |                                                                                                                                                         | 1.5 ( 1 - 3 )        |               |                                                                                                                                                                               |               |          |                                                                                                                                              |               |               |                                                                                                                                                                                                                                                                                                                                                        |               |         |                                                                                                                                     |         |         |                                                                                                                                                                                                                                                         |  |  |
| <b>Anus</b>                                                                                                                                                                                           | <b>96</b> |                                                                                                                                                                                                                   |                 |               |                                                                                                                                                         | <b>8.0 ( 6 - 9 )</b> |               |                                                                                                                                                                               |               |          |                                                                                                                                              |               |               |                                                                                                                                                                                                                                                                                                                                                        |               |         |                                                                                                                                     |         |         |                                                                                                                                                                                                                                                         |  |  |
| Stage I                                                                                                                                                                                               | 97        |                                                                                                                                                                                                                   |                 |               |                                                                                                                                                         | 9.0 ( 8 - 9 )        |               |                                                                                                                                                                               |               |          | 3.0 ( 2 - 7 )                                                                                                                                | 5.5 ( 4 - 8 ) | 6.0 ( 4 - 8 ) | 6.0 ( 4 - 8 )                                                                                                                                                                                                                                                                                                                                          | 7.0 ( 5 - 8 ) |         |                                                                                                                                     |         |         |                                                                                                                                                                                                                                                         |  |  |
| Stage II                                                                                                                                                                                              | 98        |                                                                                                                                                                                                                   |                 |               |                                                                                                                                                         | 8.0 ( 6 - 8 )        |               |                                                                                                                                                                               |               |          | 2.0 ( 2 - 5 )                                                                                                                                | 5.0 ( 4 - 6 ) | 5.0 ( 4 - 7 ) | 5.0 ( 4 - 7 )                                                                                                                                                                                                                                                                                                                                          | 5.0 ( 5 - 7 ) |         |                                                                                                                                     |         |         |                                                                                                                                                                                                                                                         |  |  |
| Stage III                                                                                                                                                                                             | 99        |                                                                                                                                                                                                                   |                 |               |                                                                                                                                                         | 5.0 ( 5 - 7 )        |               |                                                                                                                                                                               |               |          | 1.0 ( 1 - 3 )                                                                                                                                | 3.5 ( 2 - 5 ) | 3.0 ( 2 - 5 ) | 3.5 ( 2 - 5 )                                                                                                                                                                                                                                                                                                                                          | 4.0 ( 3 - 6 ) |         |                                                                                                                                     |         |         |                                                                                                                                                                                                                                                         |  |  |
| Stage IV                                                                                                                                                                                              | 100       |                                                                                                                                                                                                                   |                 |               |                                                                                                                                                         | 1.0 ( 1 - 3 )        |               |                                                                                                                                                                               |               |          |                                                                                                                                              |               |               |                                                                                                                                                                                                                                                                                                                                                        |               |         |                                                                                                                                     |         |         |                                                                                                                                                                                                                                                         |  |  |

SECTION 2

TABLE 2. HEMATOLOGIC CANCERS: LYMPHOMA

|                                                                                                                                                                                                              |                                                                                                                                                     |                                                                                                                                                                |                                                                                                                                                                                       |                                                                                                                                                                                                                                                                                                                                                                                                                                                                                                                                                                                                                             |                                                                                                                                                                                                     |                                                                                                                                                                                                                                                                                                                                               |                                                                                                                                                                                                                                                                                                                     |                  |               |               |               |               |                                                                                                                                                                           |               |          |          |          |          |                                                                                                                                                                                                                                                                                                                                                                                                                                                          |  |  |  |  |  |
|--------------------------------------------------------------------------------------------------------------------------------------------------------------------------------------------------------------|-----------------------------------------------------------------------------------------------------------------------------------------------------|----------------------------------------------------------------------------------------------------------------------------------------------------------------|---------------------------------------------------------------------------------------------------------------------------------------------------------------------------------------|-----------------------------------------------------------------------------------------------------------------------------------------------------------------------------------------------------------------------------------------------------------------------------------------------------------------------------------------------------------------------------------------------------------------------------------------------------------------------------------------------------------------------------------------------------------------------------------------------------------------------------|-----------------------------------------------------------------------------------------------------------------------------------------------------------------------------------------------------|-----------------------------------------------------------------------------------------------------------------------------------------------------------------------------------------------------------------------------------------------------------------------------------------------------------------------------------------------|---------------------------------------------------------------------------------------------------------------------------------------------------------------------------------------------------------------------------------------------------------------------------------------------------------------------|------------------|---------------|---------------|---------------|---------------|---------------------------------------------------------------------------------------------------------------------------------------------------------------------------|---------------|----------|----------|----------|----------|----------------------------------------------------------------------------------------------------------------------------------------------------------------------------------------------------------------------------------------------------------------------------------------------------------------------------------------------------------------------------------------------------------------------------------------------------------|--|--|--|--|--|
| <p>Please enter a rating in each yellow cell, where each cell represents a cancer or cancer stage.</p> <p>If there is heterogeneity within a category, do your best to imagine a <b>typical</b> patient.</p> | <p>Q1: What is the likelihood that adults diagnosed with this cancer at this stage today will be cured [10] with <b>typical treatment</b> [11]?</p> | <p>Q2: What is the likelihood that <b>untreated adults</b> with stage I or II of this cancer will progress to stage III or IV disease over their lifetime?</p> | <p>Q3: How long does it take this cancer to progress from the beginning of this stage [12] to the beginning of the next stage in undiagnosed adults (natural history of disease)?</p> | <p>Imagine an annual hypothetical screening blood test for patients ≥50 years of age that is 100% sensitive and 100% specific for the stage of cancer you are being asked to rate. Assume this test cannot differentiate between higher and lower risk cancers.</p> <p>If all cancers of this type were diagnosed no later than the stage [13] indicated by the row heading, to what extent would...</p> <p>Q4: ...<b>life expectancy</b> increase in <b>all</b> patients with this cancer, relative to life expectancy without the screening test [15]?</p> <p>Assume patients are receiving <b>typical treatment</b>.</p> | <p>...<b>cure rates</b> increase in <b>all</b> patients with this cancer, relative to cure rates without the screening test?</p> <p>Q5: Assume patients are receiving <b>typical treatment</b>.</p> | <p>Q6: Assume patients are receiving <b>best available treatment</b> [16].</p> <p>Q7: If all cancers of this type were diagnosed no later than this stage, to what extent would <b>cure rates</b> increase with <b>typical treatment</b> in <b>all</b> patients with this cancer, relative to 2030 cure rates without the screening test?</p> | <p>For columns <b>A</b> through <b>F</b>, enter a rating of 1 through 9, where:</p> <p>1=Extremely unlikely<br/>                     3=Somewhat unlikely<br/>                     5=Neutral, neither likely nor unlikely<br/>                     7=Somewhat likely<br/>                     9=Extremely likely</p> |                  |               |               |               |               | <p>For column <b>G</b>, enter a rating of 1 through 9, where:</p> <p>1=Less than 1 year<br/>                     5=5 years<br/>                     9=9 or more years</p> |               |          |          |          |          | <p>For columns <b>H</b> through <b>K</b>, enter a rating of 1 through 9, where your answer reflects your judgement about how much the outcome of interest (e.g., life expectancy in Q4 and cure rates in Q5, Q6, Q7) would increase:</p> <p>1=Not at all<br/>                     3=Slightly<br/>                     5=Moderately<br/>                     7=Considerably<br/>                     9=A great deal, doubling the outcome of interest</p> |  |  |  |  |  |
|                                                                                                                                                                                                              |                                                                                                                                                     |                                                                                                                                                                |                                                                                                                                                                                       |                                                                                                                                                                                                                                                                                                                                                                                                                                                                                                                                                                                                                             |                                                                                                                                                                                                     |                                                                                                                                                                                                                                                                                                                                               | Lower risk [17]                                                                                                                                                                                                                                                                                                     | Higher risk [18] | Overall       | Lower risk    | Higher risk   | Overall       | Overall                                                                                                                                                                   | Overall       | Overall  | Overall  | Overall  | Overall  |                                                                                                                                                                                                                                                                                                                                                                                                                                                          |  |  |  |  |  |
|                                                                                                                                                                                                              |                                                                                                                                                     |                                                                                                                                                                |                                                                                                                                                                                       |                                                                                                                                                                                                                                                                                                                                                                                                                                                                                                                                                                                                                             |                                                                                                                                                                                                     |                                                                                                                                                                                                                                                                                                                                               | <b>A</b>                                                                                                                                                                                                                                                                                                            | <b>B</b>         | <b>C</b>      | <b>D</b>      | <b>E</b>      | <b>F</b>      | <b>G</b>                                                                                                                                                                  | <b>H</b>      | <b>I</b> | <b>J</b> | <b>K</b> | <b>K</b> |                                                                                                                                                                                                                                                                                                                                                                                                                                                          |  |  |  |  |  |
| <b>Lymphoma</b>                                                                                                                                                                                              | <b>101</b>                                                                                                                                          |                                                                                                                                                                |                                                                                                                                                                                       |                                                                                                                                                                                                                                                                                                                                                                                                                                                                                                                                                                                                                             |                                                                                                                                                                                                     |                                                                                                                                                                                                                                                                                                                                               |                                                                                                                                                                                                                                                                                                                     |                  |               |               |               |               |                                                                                                                                                                           |               |          |          |          |          |                                                                                                                                                                                                                                                                                                                                                                                                                                                          |  |  |  |  |  |
| Stage I                                                                                                                                                                                                      | <b>102</b>                                                                                                                                          | 9.0 ( 8 – 9 )                                                                                                                                                  | 8.0 ( 5 – 8 )                                                                                                                                                                         | 8.0 ( 7 – 9 )                                                                                                                                                                                                                                                                                                                                                                                                                                                                                                                                                                                                               |                                                                                                                                                                                                     |                                                                                                                                                                                                                                                                                                                                               | 5.0 ( 3 – 6 )                                                                                                                                                                                                                                                                                                       | 9.0 ( 7 – 9 )    | 7.0 ( 6 – 8 ) |               |               |               |                                                                                                                                                                           |               |          |          |          |          |                                                                                                                                                                                                                                                                                                                                                                                                                                                          |  |  |  |  |  |
| Stage II                                                                                                                                                                                                     | <b>103</b>                                                                                                                                          | 8.0 ( 7 – 9 )                                                                                                                                                  | 7.0 ( 3 – 8 )                                                                                                                                                                         | 8.0 ( 5 – 8 )                                                                                                                                                                                                                                                                                                                                                                                                                                                                                                                                                                                                               |                                                                                                                                                                                                     |                                                                                                                                                                                                                                                                                                                                               |                                                                                                                                                                                                                                                                                                                     |                  |               | 4.0 ( 2 – 6 ) | 4.5 ( 2 – 8 ) | 4.0 ( 3 – 8 ) | 5.0 ( 3 – 8 )                                                                                                                                                             | 7.0 ( 5 – 7 ) |          |          |          |          |                                                                                                                                                                                                                                                                                                                                                                                                                                                          |  |  |  |  |  |
| Stage III                                                                                                                                                                                                    | <b>104</b>                                                                                                                                          | 6.5 ( 3 – 8 )                                                                                                                                                  | 5.5 ( 1 – 7 )                                                                                                                                                                         | 6.0 ( 3 – 7 )                                                                                                                                                                                                                                                                                                                                                                                                                                                                                                                                                                                                               |                                                                                                                                                                                                     |                                                                                                                                                                                                                                                                                                                                               |                                                                                                                                                                                                                                                                                                                     |                  |               | 2.5 ( 1 – 5 ) | 4.0 ( 3 – 6 ) | 4.0 ( 3 – 6 ) | 4.0 ( 3 – 7 )                                                                                                                                                             | 6.0 ( 3 – 7 ) |          |          |          |          |                                                                                                                                                                                                                                                                                                                                                                                                                                                          |  |  |  |  |  |
| Stage IV                                                                                                                                                                                                     | <b>105</b>                                                                                                                                          | 5.0 ( 2 – 7 )                                                                                                                                                  | 5.0 ( 1 – 6 )                                                                                                                                                                         | 5.0 ( 2 – 6 )                                                                                                                                                                                                                                                                                                                                                                                                                                                                                                                                                                                                               |                                                                                                                                                                                                     |                                                                                                                                                                                                                                                                                                                                               |                                                                                                                                                                                                                                                                                                                     |                  |               | 2.0 ( 1 – 3 ) | 3.0 ( 2 – 5 ) | 3.0 ( 2 – 4 ) | 3.5 ( 2 – 4 )                                                                                                                                                             | 5.0 ( 3 – 7 ) |          |          |          |          |                                                                                                                                                                                                                                                                                                                                                                                                                                                          |  |  |  |  |  |

[10] Curability is the receipt of effective treatment such that a population of individuals who are “cured” would have the same life expectancy as a population that never had the cancer being considered. Some members of each of those populations (cured and never had cancer) might be expected to die prematurely (e.g., from trauma), but many more would be expected to die of more typical age-related causes.

[11] Includes active treatment or surveillance.

[12] For example, to answer 2G, consider the time from the beginning of stage I to the beginning of stage II. For 3G, consider the time from the beginning of stage II to the beginning of stage III. Similarly, for 4G, consider the time from the beginning of stage III to the beginning of stage IV.

[13] For stage I, assume all stage II-IV cancers are detected during stage I. For stage II, assume that all stage III and IV cancers are detected by stage II; any cancers that had been detected in stage I or II would still be detected during those stages. For the stage III, assume all stage IV cancers were diagnosed during stage III; any cancers that had been detected in stages I-III would still be detected during those stages.

[14] If there are many treatment advancements, cure rates may increase, and if treatment remains unchanged, cure rates are unlikely to change.

[15] A patient who is not cured could have increased life expectancy (e.g. still die of this cancer).

[16] Treatment consistent with NCCN guidelines.

[17] Please refer to the table above for examples of lower risk cancers.

[18] Please refer to the table above for examples of higher risk cancers.

TABLE 3. OTHER HEMATOLOGIC CANCERS

|                                                                                                                                                                                            |                                                                                                                                                                                                                   |                             |                              |                                                                                                                                                  |                        |                         |                                                                                                                                                                                                                                                                                                                                                                                                                                                                                                                                                                                          |                     |                     |                                                                                                                                                                                                                                                                               |                     |  |                                                                                                                                                                                                                                                                                                                                                                          |  |  |
|--------------------------------------------------------------------------------------------------------------------------------------------------------------------------------------------|-------------------------------------------------------------------------------------------------------------------------------------------------------------------------------------------------------------------|-----------------------------|------------------------------|--------------------------------------------------------------------------------------------------------------------------------------------------|------------------------|-------------------------|------------------------------------------------------------------------------------------------------------------------------------------------------------------------------------------------------------------------------------------------------------------------------------------------------------------------------------------------------------------------------------------------------------------------------------------------------------------------------------------------------------------------------------------------------------------------------------------|---------------------|---------------------|-------------------------------------------------------------------------------------------------------------------------------------------------------------------------------------------------------------------------------------------------------------------------------|---------------------|--|--------------------------------------------------------------------------------------------------------------------------------------------------------------------------------------------------------------------------------------------------------------------------------------------------------------------------------------------------------------------------|--|--|
| Please enter a rating in each yellow cell, where each cell represents a cancer type.<br><br>If there is heterogeneity within a category, do your best to imagine a <b>typical</b> patient. | Q1: What is the likelihood that adults diagnosed with this cancer today will be cured [19] with <b>typical treatment</b> [20]?                                                                                    |                             |                              | Q2: What is the likelihood that <b>untreated adults</b> early [21] in their disease course with this cancer will progress and require treatment? |                        |                         | Imagine an annual hypothetical screening blood test for patients ≥50 years of age that is 100% sensitive and 100% specific for the cancer you are being asked to rate. Assume this test cannot differentiate between higher and lower risk cancers.<br><br>If all cancers of this type were diagnosed earlier [21] in their disease course, to what extent would...<br><br>Q3: ... <b>life expectancy</b> increase in <b>all patients</b> with this cancer, relative to life expectancy without the screening test [23]?<br><br>Assume patients are receiving <b>typical treatment</b> . |                     |                     | ... <b>cure rates</b> increase in <b>all patients</b> with this cancer, relative to cure rates without the screening test?<br><br>Q4: Assume patients are receiving <b>typical treatment</b> .<br><br>Q5: Assume patients are receiving <b>best available treatment</b> [24]. |                     |  | Now consider what medical practice might be like in 2030 [22] with cure rates higher than today's.<br><br>Q6: If all cancers of this type were diagnosed earlier in their disease course, to what extent would <b>cure rates</b> increase with <b>typical treatment</b> in <b>all patients</b> with this cancer, relative to 2030 cure rates without the screening test? |  |  |
|                                                                                                                                                                                            | For columns <b>A</b> through <b>F</b> , enter a rating of 1 through 9, where:<br>1=Extremely unlikely<br>3=Somewhat unlikely<br>5=Neutral, neither likely nor unlikely<br>7=Somewhat likely<br>9=Extremely likely |                             |                              |                                                                                                                                                  |                        |                         | For columns <b>G</b> through <b>J</b> , enter a rating of 1 through 9, where your answer reflects your judgement about how much the outcome of interest (e.g., life expectancy in Q3 and cure rates in Q4, Q5, Q6) would increase:<br>1=Not at all<br>3=Slightly<br>5=Moderately<br>7=Considerably<br>9=A great deal, doubling the outcome of interest                                                                                                                                                                                                                                   |                     |                     |                                                                                                                                                                                                                                                                               |                     |  |                                                                                                                                                                                                                                                                                                                                                                          |  |  |
|                                                                                                                                                                                            |                                                                                                                                                                                                                   | Lower risk [25]<br><b>A</b> | Higher risk [26]<br><b>B</b> | Overall<br><b>C</b>                                                                                                                              | Lower risk<br><b>D</b> | Higher risk<br><b>E</b> | Overall<br><b>F</b>                                                                                                                                                                                                                                                                                                                                                                                                                                                                                                                                                                      | Overall<br><b>G</b> | Overall<br><b>H</b> | Overall<br><b>I</b>                                                                                                                                                                                                                                                           | Overall<br><b>J</b> |  |                                                                                                                                                                                                                                                                                                                                                                          |  |  |
| ALL [27]                                                                                                                                                                                   | 106                                                                                                                                                                                                               |                             | 4.0 ( 3 – 5 )                |                                                                                                                                                  |                        | 9.0 ( 1 – 9 )           | 3.0 ( 1 – 5 )                                                                                                                                                                                                                                                                                                                                                                                                                                                                                                                                                                            | 3.0 ( 1 – 5 )       | 3.0 ( 1 – 5 )       | 5.0 ( 4 – 5 )                                                                                                                                                                                                                                                                 |                     |  |                                                                                                                                                                                                                                                                                                                                                                          |  |  |
| CLL [28]                                                                                                                                                                                   | 107                                                                                                                                                                                                               | 4.5 ( 1 – 7 )               | 4.0 ( 1 – 7 )                | 3.5 ( 1 – 7 )                                                                                                                                    | 7.0 ( 1 – 9 )          | 5.0 ( 1 – 8 )           | 2.5 ( 1 – 5 )                                                                                                                                                                                                                                                                                                                                                                                                                                                                                                                                                                            | 2.5 ( 1 – 5 )       | 3.0 ( 1 – 5 )       | 4.0 ( 1 – 5 )                                                                                                                                                                                                                                                                 |                     |  |                                                                                                                                                                                                                                                                                                                                                                          |  |  |
| Lymphoid Leukemia                                                                                                                                                                          | 108                                                                                                                                                                                                               |                             | 5 ( 3 – 6 )                  |                                                                                                                                                  |                        | 7.0 ( 4 – 8 )           | 3 ( 1 – 5 )                                                                                                                                                                                                                                                                                                                                                                                                                                                                                                                                                                              | 3 ( 1 – 5 )         | 3 ( 1 – 5 )         | 5 ( 1 – 5 )                                                                                                                                                                                                                                                                   |                     |  |                                                                                                                                                                                                                                                                                                                                                                          |  |  |
| Plasma Cell Neoplasm (Multiple Myeloma)                                                                                                                                                    | 109                                                                                                                                                                                                               | 7.0 ( 5 – 8 )               | 2.0 ( 1 – 3 )                | 3.5 ( 2 – 5 )                                                                                                                                    | 6.0 ( 2 – 7 )          | 8.0 ( 6 – 9 )           | 7.0 ( 7 – 8 )                                                                                                                                                                                                                                                                                                                                                                                                                                                                                                                                                                            | 4.5 ( 3 – 5 )       | 3.5 ( 2 – 5 )       | 4.5 ( 2 – 5 )                                                                                                                                                                                                                                                                 | 5.0 ( 4 – 7 )       |  |                                                                                                                                                                                                                                                                                                                                                                          |  |  |
| AML                                                                                                                                                                                        | 110                                                                                                                                                                                                               | 6.0 ( 5 – 7 )               | 2.0 ( 2 – 4 )                | 3.5 ( 3 – 5 )                                                                                                                                    | 8.5 ( 7 – 9 )          | 9.0 ( 7 – 9 )           | 9.0 ( 7 – 9 )                                                                                                                                                                                                                                                                                                                                                                                                                                                                                                                                                                            | 3.5 ( 1 – 6 )       | 3.5 ( 1 – 5 )       | 4.0 ( 1 – 5 )                                                                                                                                                                                                                                                                 | 5.0 ( 1 – 5 )       |  |                                                                                                                                                                                                                                                                                                                                                                          |  |  |
| CML                                                                                                                                                                                        | 111                                                                                                                                                                                                               |                             | 7.0 ( 5 – 8 )                |                                                                                                                                                  |                        | 8.0 ( 6 – 9 )           | 8.0 ( 6 – 9 )                                                                                                                                                                                                                                                                                                                                                                                                                                                                                                                                                                            | 3.0 ( 1 – 5 )       | 2.0 ( 1 – 5 )       | 3.0 ( 1 – 5 )                                                                                                                                                                                                                                                                 | 4.0 ( 1 – 5 )       |  |                                                                                                                                                                                                                                                                                                                                                                          |  |  |
| Myeloid Neoplasm                                                                                                                                                                           | 112                                                                                                                                                                                                               |                             | 4.0 ( 3 – 7 )                |                                                                                                                                                  |                        | 8.0 ( 7 – 9 )           | 8.0 ( 7 – 9 )                                                                                                                                                                                                                                                                                                                                                                                                                                                                                                                                                                            | 3.0 ( 1 – 5 )       | 3.0 ( 1 – 4 )       | 3.0 ( 1 – 5 )                                                                                                                                                                                                                                                                 | 5.0 ( 1 – 5 )       |  |                                                                                                                                                                                                                                                                                                                                                                          |  |  |

[19] Curability is the receipt of effective treatment such that a population of individuals who are "cured" would have the same life expectancy as a population that never had the cancer being considered. Some members of each of those populations (cured and never had cancer) might be expected to die prematurely (e.g., from trauma), but many more would be expected to die of more typical age-related causes.

[20] Includes active treatment or surveillance.

[21] We define "early" as asymptomatic but already meeting the definition of cancer (e.g., not having a precursor condition).

[22] If there are many treatment advancements, cure rates may increase, and if treatment remains unchanged, cure rates are unlikely to change.

[23] A patient who is not cured could have increased life expectancy (e.g. still die of this cancer).

[24] Treatment consistent with NCCN guidelines.

[25] Please refer to the table above for examples of lower risk cancers.

[26] Please refer to the table above for examples of higher risk cancers.

[27] Acute lymphocytic (or lymphoblastic) leukemia.

[28] Chronic lymphocytic (or lymphoblastic) leukemia.

[29] Acute myeloid leukemia.

[30] Chronic myeloid leukemia.
